# Supplementary material for: The relationship between immune and cognitive dysfunction in mood and psychotic disorder: a systematic review and a meta-analysis
Source: PubMed Central journal article supplement (PMC9708549; doi:10.1038/s41380-022-01582-y), 2022-04-28
Supplement: 41380_2022_1582_MOESM1_ESM.pdf [file 41380_2022_1582_MOESM1_ESM.pdf]

Supplementary Table 1: PRISMA Checklist

| Section and Topic             | Item # | Checklist item                                                                                                                                                                                                                                                                                       | Location where item is reported                                |
|-------------------------------|--------|------------------------------------------------------------------------------------------------------------------------------------------------------------------------------------------------------------------------------------------------------------------------------------------------------|----------------------------------------------------------------|
| <b>TITLE</b>                  |        |                                                                                                                                                                                                                                                                                                      |                                                                |
| Title                         | 1      | Identify the report as a systematic review.                                                                                                                                                                                                                                                          | Title                                                          |
| <b>ABSTRACT</b>               |        |                                                                                                                                                                                                                                                                                                      |                                                                |
| Abstract                      | 2      | See the PRISMA 2020 for Abstracts checklist.                                                                                                                                                                                                                                                         | Abstract                                                       |
| <b>INTRODUCTION</b>           |        |                                                                                                                                                                                                                                                                                                      |                                                                |
| Rationale                     | 3      | Describe the rationale for the review in the context of existing knowledge.                                                                                                                                                                                                                          | Introduction                                                   |
| Objectives                    | 4      | Provide an explicit statement of the objective(s) or question(s) the review addresses.                                                                                                                                                                                                               | Introduction                                                   |
| <b>METHODS</b>                |        |                                                                                                                                                                                                                                                                                                      |                                                                |
| Eligibility criteria          | 5      | Specify the inclusion and exclusion criteria for the review and how studies were grouped for the syntheses.                                                                                                                                                                                          | Methods and materials, search strategy                         |
| Information sources           | 6      | Specify all databases, registers, websites, organisations, reference lists and other sources searched or consulted to identify studies. Specify the date when each source was last searched or consulted.                                                                                            | Methods and materials, search strategy                         |
| Search strategy               | 7      | Present the full search strategies for all databases, registers and websites, including any filters and limits used.                                                                                                                                                                                 | Supplementary table 2                                          |
| Selection process             | 8      | Specify the methods used to decide whether a study met the inclusion criteria of the review, including how many reviewers screened each record and each report retrieved, whether they worked independently, and if applicable, details of automation tools used in the process.                     | Methods and materials, search strategy, Supplementary Figure 1 |
| Data collection process       | 9      | Specify the methods used to collect data from reports, including how many reviewers collected data from each report, whether they worked independently, any processes for obtaining or confirming data from study investigators, and if applicable, details of automation tools used in the process. | Methods and materials, data extraction and evaluation          |
| Data items                    | 10a    | List and define all outcomes for which data were sought. Specify whether all results that were compatible with each outcome domain in each study were sought (e.g. for all measures, time points, analyses), and if not, the methods used to decide which results to collect.                        | Methods and materials, data extraction and evaluation          |
|                               | 10b    | List and define all other variables for which data were sought (e.g. participant and intervention characteristics, funding sources). Describe any assumptions made about any missing or unclear information.                                                                                         | Methods and materials, data extraction and evaluation          |
| Study risk of bias assessment | 11     | Specify the methods used to assess risk of bias in the included studies, including details of the tool(s) used, how many reviewers assessed each study and whether they worked independently, and if applicable, details of automation tools used in the process.                                    | Methods and materials, data extraction and evaluation          |
| Effect measures               | 12     | Specify for each outcome the effect measure(s) (e.g. risk ratio, mean difference) used in the synthesis or presentation of results.                                                                                                                                                                  | Methods and materials, data extraction and                     |

| Section and Topic         | Item # | Checklist item                                                                                                                                                                                                                                              | Location where item is reported                                                |
|---------------------------|--------|-------------------------------------------------------------------------------------------------------------------------------------------------------------------------------------------------------------------------------------------------------------|--------------------------------------------------------------------------------|
|                           |        |                                                                                                                                                                                                                                                             | evaluation                                                                     |
| Synthesis methods         | 13a    | Describe the processes used to decide which studies were eligible for each synthesis (e.g. tabulating the study intervention characteristics and comparing against the planned groups for each synthesis (item #5)).                                        | Methods and materials, data extraction and evaluation                          |
|                           | 13b    | Describe any methods required to prepare the data for presentation or synthesis, such as handling of missing summary statistics, or data conversions.                                                                                                       | Methods and materials, data extraction and evaluation                          |
|                           | 13c    | Describe any methods used to tabulate or visually display results of individual studies and syntheses.                                                                                                                                                      | Methods and materials, data extraction and evaluation, Supplementary table 5-7 |
|                           | 13d    | Describe any methods used to synthesize results and provide a rationale for the choice(s). If meta-analysis was performed, describe the model(s), method(s) to identify the presence and extent of statistical heterogeneity, and software package(s) used. | Methods and materials, Data synthesis and analysis                             |
|                           | 13e    | Describe any methods used to explore possible causes of heterogeneity among study results (e.g. subgroup analysis, meta-regression).                                                                                                                        | Methods and materials, Data synthesis and analysis                             |
|                           | 13f    | Describe any sensitivity analyses conducted to assess robustness of the synthesized results.                                                                                                                                                                | Methods and materials, Data synthesis and analysis                             |
| Reporting bias assessment | 14     | Describe any methods used to assess risk of bias due to missing results in a synthesis (arising from reporting biases).                                                                                                                                     | Methods and materials, data extraction and evaluation                          |
| Certainty assessment      | 15     | Describe any methods used to assess certainty (or confidence) in the body of evidence for an outcome.                                                                                                                                                       | Methods and materials, Data synthesis and analysis                             |
| <b>RESULTS</b>            |        |                                                                                                                                                                                                                                                             |                                                                                |
| Study selection           | 16a    | Describe the results of the search and selection process, from the number of records identified in the search to the number of studies included in the review, ideally using a flow diagram.                                                                | Supplementary Figure 1 PRISMA Flowchart                                        |
|                           | 16b    | Cite studies that might appear to meet the inclusion criteria, but which were excluded, and explain why they were excluded.                                                                                                                                 | Supplementary Figure 1 PRISMA Flowchart                                        |
| Study characteristics     | 17     | Cite each included study and present its characteristics.                                                                                                                                                                                                   | Results, study selection                                                       |
| Risk of bias in studies   | 18     | Present assessments of risk of bias for each included study.                                                                                                                                                                                                | Results, assessment of publication bias, quality                               |

| Section and Topic             | Item # | Checklist item                                                                                                                                                                                                                                                                       | Location where item is reported                                                           |
|-------------------------------|--------|--------------------------------------------------------------------------------------------------------------------------------------------------------------------------------------------------------------------------------------------------------------------------------------|-------------------------------------------------------------------------------------------|
|                               |        |                                                                                                                                                                                                                                                                                      | assessment, Supplementary table 8                                                         |
| Results of individual studies | 19     | For all outcomes, present, for each study: (a) summary statistics for each group (where appropriate) and (b) an effect estimate and its precision (e.g. confidence/credible interval), ideally using structured tables or plots.                                                     | Results, supplementary figures 2-13                                                       |
| Results of syntheses          | 20a    | For each synthesis, briefly summarise the characteristics and risk of bias among contributing studies.                                                                                                                                                                               | Tables 1-4                                                                                |
|                               | 20b    | Present results of all statistical syntheses conducted. If meta-analysis was done, present for each the summary estimate and its precision (e.g. confidence/credible interval) and measures of statistical heterogeneity. If comparing groups, describe the direction of the effect. | Tables 1-4                                                                                |
|                               | 20c    | Present results of all investigations of possible causes of heterogeneity among study results.                                                                                                                                                                                       | Results, covariate assessment, assessment of publication bias supplementary figures 14-16 |
|                               | 20d    | Present results of all sensitivity analyses conducted to assess the robustness of the synthesized results.                                                                                                                                                                           | Tables 1-4                                                                                |
| Reporting biases              | 21     | Present assessments of risk of bias due to missing results (arising from reporting biases) for each synthesis assessed.                                                                                                                                                              | Results, assessment of publication bias supplementary figures 14-16                       |
| Certainty of evidence         | 22     | Present assessments of certainty (or confidence) in the body of evidence for each outcome assessed.                                                                                                                                                                                  | Results, quality assesment                                                                |
| <b>DISCUSSION</b>             |        |                                                                                                                                                                                                                                                                                      |                                                                                           |
| Discussion                    | 23a    | Provide a general interpretation of the results in the context of other evidence.                                                                                                                                                                                                    | Discussion                                                                                |
|                               | 23b    | Discuss any limitations of the evidence included in the review.                                                                                                                                                                                                                      | Discussion, limitations section                                                           |
|                               | 23c    | Discuss any limitations of the review processes used.                                                                                                                                                                                                                                | Discussion, limitations section                                                           |
|                               | 23d    | Discuss implications of the results for practice, policy, and future research.                                                                                                                                                                                                       | Discussion                                                                                |
| <b>OTHER INFORMATION</b>      |        |                                                                                                                                                                                                                                                                                      |                                                                                           |
|                               | 24a    | Provide registration information for the review, including register name and registration number, or state that the review was not registered.                                                                                                                                       | Methods and materials                                                                     |
|                               | 24b    | Indicate where the review protocol can be accessed, or state that a protocol was not prepared.                                                                                                                                                                                       | Protocol as supplementary document                                                        |
|                               | 24c    | Describe and explain any amendments to information provided at registration or in the protocol.                                                                                                                                                                                      | N/A                                                                                       |
| Support                       | 25     | Describe sources of financial or non-financial support for the review, and the role of the funders or sponsors in the                                                                                                                                                                | Disclosures                                                                               |

| Section and Topic                              | Item # | Checklist item                                                                                                                                                                                                                             | Location where item is reported           |
|------------------------------------------------|--------|--------------------------------------------------------------------------------------------------------------------------------------------------------------------------------------------------------------------------------------------|-------------------------------------------|
|                                                |        | review.                                                                                                                                                                                                                                    |                                           |
| Competing interests                            | 26     | Declare any competing interests of review authors.                                                                                                                                                                                         | Disclosures                               |
| Availability of data, code and other materials | 27     | Report which of the following are publicly available and where they can be found: template data collection forms; data extracted from included studies; data used for all analyses; analytic code; any other materials used in the review. | Collected data are not publicly available |

Supplementary Table 2: Search strings on Pubmed, Web of Science and Psycinfo

| platform       | Search strategy                                                                                                                                                                                                                                                                                                                                                                                                                                                                                                                                                                                                                                                                                                                                                                                                                                                                                                                                                                                                                                                                                                                                                                                                                                                                                                                                                                                                                                                                                                                                                                                                                                                                              |
|----------------|----------------------------------------------------------------------------------------------------------------------------------------------------------------------------------------------------------------------------------------------------------------------------------------------------------------------------------------------------------------------------------------------------------------------------------------------------------------------------------------------------------------------------------------------------------------------------------------------------------------------------------------------------------------------------------------------------------------------------------------------------------------------------------------------------------------------------------------------------------------------------------------------------------------------------------------------------------------------------------------------------------------------------------------------------------------------------------------------------------------------------------------------------------------------------------------------------------------------------------------------------------------------------------------------------------------------------------------------------------------------------------------------------------------------------------------------------------------------------------------------------------------------------------------------------------------------------------------------------------------------------------------------------------------------------------------------|
| Pubmed         | (schizophreni* OR schizoaffective OR psychotic OR psychosis OR MDD OR “depressive disorder” OR “major depression” OR manic OR mania OR bipolar OR “mood disorder” OR “affective disorder” OR dysthym*) AND (immun* OR chemokine* OR cytokine* OR interleukin* OR CRP OR C-reactive OR IL-1b OR IL-1 $\beta$ OR IL-1ra OR IL-2 OR IL-4 OR IL-6 OR IL-8 OR IL-10 OR IL-12 OR “tumor necrosis factor” OR TNF OR IFN OR IFN- $\gamma$ OR Interferon* OR kynuren* OR quinolinic OR xanthurenic OR picolinic OR anthranilic OR HLA OR lymphocyt* OR monocy* OR Leukocyt* OR neutrophil* OR basophil* or eosinophil*) AND (cogniti* OR attenti* OR vigilan* OR “executive functioning” OR reasoning OR “problem solving” OR memory OR learning OR “processing speed”) NOT (review [Publication type])                                                                                                                                                                                                                                                                                                                                                                                                                                                                                                                                                                                                                                                                                                                                                                                                                                                                                               |
| Web of Science | (ALL=(schizophreni* ) OR ALL=(schizoaffective) OR ALL=(psychotic) OR ALL=(psychosis) OR ALL=(MDD) OR ALL=(depressive disorder) OR ALL=(major depression) OR ALL=(manic) OR ALL=(mania) OR ALL=(bipolar ) OR ALL=(mood disorder) OR ALL=(affective disorder) OR ALL=(dysthym*)) AND (ALL=(immun*) OR ALL=(chemokine*) OR ALL=(cytokine* ) OR ALL=(interleukin*) OR ALL=(CRP) OR ALL=(C-reactive) OR ALL=(IL-1b) OR ALL=(IL-1 $\beta$ ) OR ALL=(IL-1ra) OR ALL=(IL-2) OR ALL=(IL-4) OR ALL=(IL-6) OR ALL=(IL-8) OR ALL=(IL-10) OR ALL=(IL-12) OR ALL=(tumor necrosis factor) OR ALL=(TNF) OR ALL=(IFN) OR ALL=(IFN- $\gamma$ ) OR ALL=(Interferon*) OR ALL=(kynuren*) OR ALL=(quinolinic) OR ALL=(xanthurenic) OR ALL=(picolinic) OR ALL=(anthranilic) OR ALL=(HLA) OR ALL=(lymphocyt*) OR ALL=(monocy*) OR ALL=(leukocyt*) OR ALL=(neutrophil*) OR ALL=(basophil*) OR ALL=(eosinophil*)) AND (ALL=(cognitive*) OR ALL=(attenti*) OR ALL=(vigilan*) OR ALL=(executive functioning) OR ALL=(reasoning) OR ALL=(problem solving) OR ALL=(memory) OR ALL=(learning) OR ALL=(processing speed))                                                                                                                                                                                                                                                                                                                                                                                                                                                                                                                                                                                                    |
| Psycinfo       | <b>Any Field:</b> schizophrenia <i>OR</i> <b>Any Field:</b> schizophreniform <i>OR</i> <b>Any Field:</b> psychotic <i>OR</i> <b>Any Field:</b> psychosis <i>OR</i> <b>Any Field:</b> MDD <i>OR</i> <b>Any Field:</b> depressive disorder <i>OR</i> <b>Any Field:</b> major depression <i>OR</i> <b>Any Field:</b> manic <i>OR</i> <b>Any Field:</b> mania <i>OR</i> <b>Any Field:</b> bipolar <i>OR</i> <b>Any Field:</b> mood disorder <i>OR</i> <b>Any Field:</b> affective disorder <i>OR</i> <b>Any Field:</b> dysthymia <i>AND</i> <b>Any Field:</b> Immune <i>OR</i> cytokine <i>OR</i> chemokine <i>OR</i> interleukin <i>OR</i> CRP <i>OR</i> IL-1b <i>OR</i> IL-1 $\beta$ <i>OR</i> IL-1ra <i>OR</i> IL-2 <i>OR</i> IL-4 <i>OR</i> IL-6 <i>OR</i> IL-8 <i>OR</i> IL-10 <i>OR</i> IL-12 <i>OR</i> tumor necrosis factor <i>OR</i> TNF <i>OR</i> IFN <i>OR</i> IFN- $\gamma$ <i>OR</i> Interferon <i>OR</i> kynurenine <i>OR</i> kynurenic <i>OR</i> quinolinic <i>OR</i> xanthurenic <i>OR</i> picolinic <i>OR</i> anthranilic <i>OR</i> HLA <i>OR</i> lymphocyte <i>OR</i> monocyte <i>OR</i> Leukocyte <i>OR</i> neutrophil <i>OR</i> basophil <i>OR</i> eosinophil <i>AND</i> <b>Any Field:</b> cognition <i>OR</i> <b>Any Field:</b> cognitive <i>OR</i> <b>Any Field:</b> attention <i>OR</i> <b>Any Field:</b> vigilance <i>OR</i> <b>Any Field:</b> executive function <i>OR</i> <b>Any Field:</b> executive functioning <i>OR</i> <b>Any Field:</b> reasoning <i>OR</i> <b>Any Field:</b> problem solving <i>OR</i> <b>Any Field:</b> memory <i>OR</i> <b>Any Field:</b> learning <i>OR</i> <b>Any Field:</b> processing speed <i>AND</i> <b>Peer-Reviewed Journals only</b> |

Supplementary Table 3: Investigated cognitive domains and cognitive tests included

| Domain                        | Tests                                                                                                                             |
|-------------------------------|-----------------------------------------------------------------------------------------------------------------------------------|
| Verbal learning and memory    | List learning tasks (RBANS-memory, BACS, CVLT, RaVLT,...)                                                                         |
| Visual learning and memory    | RBANS-visuospatial; pairs matching test;                                                                                          |
| Working memory                | LNS, Letter sequencing, Digit backward, spatial span test, Digit sequencing test, BACS-WM, MCCB-WM, delayed match to sample test, |
| Attention and vigilance       | RBANS-attention, MCCB-attention, BACS-attention, CANTAB-attention, CPT, Digit span, simple reaction time                          |
| Processing speed              | Digit Symbol Coding tests, TMTB                                                                                                   |
| Reasoning and problem solving | WCST, Tower of London, CANTAB-set shift, Stroop test, Mazes, BACS-EF, abstraction test, matrix reasoning, MCCB reasoning,         |
| Language                      | RBANS-language, Verbal Fluency tests, COWAT, naming test                                                                          |

Supplementary Table 4: Included inflammatory markers

| Category                  | Inflammatory markers                                                                                                                                                          |
|---------------------------|-------------------------------------------------------------------------------------------------------------------------------------------------------------------------------|
| Pro-inflammatory markers  | (hs)CRP, IL-1b, IL-2, IL-3, IL-6, IL-7, IL-8, IL-12-p70, IL-15, IL-16, IL-17, IL-18, IL-33, IFN-g, TNF-a, TNF-b, sTNFR1, sTNFR2, CCL-11, CCL-17, CCL-22, CXCL-10, MCP-1, sST2 |
| Anti-inflammatory markers | IL-1ra, IL-4, IL-10, IL-11, IL-13, TGFb                                                                                                                                       |

Supplementary Table 5: Demographic characteristics of included studies

| Study Name           | year | Diagnosis | N   | mean age | DOI  | BMI   | %mP  | smoking% |
|----------------------|------|-----------|-----|----------|------|-------|------|----------|
| Ali                  | 2018 | MDD       | 40  | 64,1     | 29,4 | 24,01 | 53   | NR       |
| Amin                 | 2020 | SZ        | 50  | 35,4     | NR   | 21,6  | 76   | NR       |
| Asevedo              | 2013 | SZ        | 30  | 33,7     | NR   | NR    | 83   | 48       |
| Asevedo              | 2014 | SZ        | 29  | 33,2     | 11,8 | NR    | 83   | 46       |
| Barbosa              | 2018 | BD        | 20  | 43,8     | 20,2 | NR    | 25   | NR       |
| Barbosa              | 2012 | BD        | 25  | 50,9     | 27,9 | 29,1  | 32   | NR       |
| Belge                | 2021 | MDD       | 62  | 58,2     | NR   | 24,6  | 23   | 21       |
| Bobinska             | 2016 | MDD       | 89  | 39,9     | 7    | NR    | 44   | NR       |
| Boozalis             | 2018 | SZ        | 39  | 32,8     | NR   | 27,3  | 74   | NR       |
| Borovcanin           | 2020 | SZ        | 27  | 36,2     | 9,95 | 25,4  | 59   | NR       |
| Cathomas             | 2021 | MDD       | 44  | 35,8     | 7    | 22,9  | 40   | 23       |
|                      |      | SZ        | 45  | 34       | 10,1 | 26,4  | 69   | 64       |
| Chakrabarty          | 2018 | BD        | 51  | 23,2     | 25,3 | 25,2  | 47   | NR       |
| Chang                | 2012 | MDD       | 112 | 38,8     | NR   | NR    | 28   | 16       |
| Chung                | 2013 | BD        | 17  | 31,3     | 8,3  | 23,3  | 23,3 | 41       |
| Dal Santo            | 2020 | SZ        | 132 | 37,8     | 8,93 | 28,2  | 62   | 49       |
| de Campos-Carli      | 2017 | SZ        | 40  | 40,8     | 11,9 | NR    | 53   | NR       |
| De Picker            | 2020 | SZ        | 49  | 32,4     | 6,1  | 24,9  | 86   | 64       |
| Doganavsargil-Baysal | 2013 | BD        | 54  | 39,5     | 12,5 | NR    | 33   | NR       |
| Dorofeikova          | 2018 | SZ        | 125 | 35,8     | 12   | NR    | 58   | NR       |
| Elderkin-Thompson    | 2012 | MDD       | 42  | 69,7     | NR   | 25,6  | 33   | NR       |
| Ergun                | 2018 | SZ        | 30  | 36,4     | 11,4 | 27,2  | 70   | 53       |
| Fang                 | 2019 | SZ        | 174 | 35,8     | NR   | 24,1  | 47   | NR       |
| Fathian              | 2019 | SZ        | 208 | 33,5     | NR   | 23,7  | 69   | NR       |



|                          |       |     |       |      |      |      |      |    |
|--------------------------|-------|-----|-------|------|------|------|------|----|
| Frydecka                 | 2015a | SZ  | 151   | 37,8 | 12,2 | NR   | 46   | NR |
| Frydecka                 | 2015b | SZ  | 151   | 37,8 | 12,2 | NR   | 46   | NR |
| Goldsmith                | 2016  | MDD | 93    | 39,4 | NR   | 31,5 | NR   | NR |
| Grassi-Oliveira          | 2011  | MDD | 30    | 39,2 | 11,5 | 25,8 | NR   | NR |
| Hori                     | 2016  | SZ  | 146   | 33,6 | 8,7  | NR   | 51   | 36 |
| Huang                    | 2020  | SZ  | 30    | 27,6 | 2,9  | NR   | 50   | NR |
| Jin                      | 2020  | MDD | 100   | 27,8 | NR   | NR   | 38   | NR |
| Johnsen                  | 2016  | SZ  | 124   | 33,5 | NR   | 23,5 | 68   | 52 |
| Joseph                   | 2015  | SZ  | 88    | 49,4 | 23,6 | 31   | 39,4 | 49 |
| Kindler                  | 2020  | SZ  | 96    | 35,7 | 12,9 | NR   | 61   | 49 |
| King                     | 2021  | SZ  | 104   | 42   | NR   | 29,5 | 70   | NR |
| Klaus                    | 2021  | SZ  | 16    | 42   | NR   | NR   | 25   | NR |
| Kogan                    | 2018  | SZ  | 32    | 37   | NR   | 31,1 | 64   | 24 |
| Kudo                     | 2018  | SZ  | 87    | 42,5 | 12,3 | NR   | 50   | NR |
| Lizano                   | 2019  | SZ  | 223   | 35,1 | 15,5 | NR   | 66   | NR |
|                          |       | BD  | 190   | 36,1 | 19,5 | NR   | 31   | NR |
| Lizano                   | 2021  | SZ  | 140   | 34,3 | 18,5 | NR   | 43   | NR |
| Malmqvist                | 2019  | SZ  | 41    | 28   | 0,5  | 21,6 | 63   | 8  |
| Martinez-Cengotitabengoa | 2012  | SZ  | 28    | 27,7 | 0    | NR   | 75   | NR |
| Miller                   | 2020  | SZ  | 31    | 31   | 10,4 | 25,8 | 61   | 45 |
| Millet                   | 2019  | BD  | 222   | 44   | NR   | 29,9 | 53   | NR |
| Millet                   | 2020  | BD  | 219   | 44   | 22   | 29,9 | 53   | NR |
| Milton                   | 2021  | BD  | 969   | 55,5 | NR   | 28,2 | 54   | NR |
|                          |       | MDD | 22441 | 56   | NR   | 27,8 | 51   | NR |
| Mora                     | 2018  | BD  | 84    | 45,1 | NR   | 28   | 52   | NR |
| Moustafa                 | 2020  | SZ  | 115   | 36,3 | 8    | 28,9 | 68   | NR |

|                |      |     |     |      |      |      |      |      |
|----------------|------|-----|-----|------|------|------|------|------|
| North          | 2021 | SZ  | 499 | 39,6 | 15,8 | NR   | 65   | 72   |
| Noyan          | 2021 | SZ  | 150 | 31,6 | 5,6  | 25,2 | 75   | 56   |
| Orhan          | 2018 | SZ  | 25  | 28,5 | NR   | 21,8 | 71   | 26   |
| Peters         | 2019 | MDD | 40  | 14,5 | 2,4  | NR   | 40   | NR   |
| Qu             | 2019 | MDD | 104 | 34,1 | 9,3  | 22,7 | 36   | 19   |
| Rahmani        | 2021 | BD  | 26  | 17,6 | 1,9  | 21,9 | 42   | 15   |
| Reboucas       | 2018 | SZ  | 35  | 40   | NR   | 26,1 | 69   | 43   |
| Ribeiro-Santos | 2019 | SZ  | 63  | 42,4 | 15,9 | 25,6 | 52,4 | 30,1 |
| Sanchez-autet  | 2018 | BD  | 224 | 47,1 | 19,5 | 28,5 | 34,7 | 45,2 |
| Saraykar       | 2018 | MDD | 74  | 73   | NR   | 26,6 | 9    | NR   |
| Smagula        | 2017 | MDD | 31  | 68,8 | NR   | 30,9 | 77   | NR   |
| Strawbridge    | 2021 | BD  | 44  | 43,7 | NR   | 27,8 | 30   | NR   |
| Tanaka         | 2017 | BD  | 32  | 39   | NR   | NR   | 64   | 39   |
| Tateishi       | 2020 | MDD | 11  | 52,2 | 6    | NR   | 55   | NR   |
| Tseng          | 2019 | BD  | 24  | 36,5 | NR   | NR   | 36   | 24   |
| Van den Ameele | 2020 | BD  | 67  | 43,1 | NR   | 25,3 | 48   | 36   |
| Vinberg        | 2016 | MDD | 44  | 43   | NR   | 26   | 69   | NR   |
| Weiser         | 2019 | SZ  | 200 | 43   | 13   | NR   | 44   | NR   |
| Wilson         | 2018 | SZ  | 14  | 47   | NR   | 40   | 0    | 57   |
| Wu             | 2016 | SZ  | 70  | 46,2 | 21,5 | 24,9 | 41   | 68   |
| Xiu            | 2016 | SZ  | 128 | 26,4 | 1    | 20,1 | 59   | 28   |
| Xiu            | 2018 | SZ  | 45  | 26,4 | 1    | 20,1 | 59   | 28   |
| Ye             | 2018 | MDD | 30  | 42,6 | 5,8  | 22,9 | 40   | 17   |
| Zazula         | 2021 | BD  | 31  | 40   | 19   | 28   | 19   | NR   |
| Zhang          | 2013 | SZ  | 77  | 29,2 | 2,7  | 22,6 | 52   | 25   |
| Zhang          | 2021 | SZ  | 75  | NR   | NR   | NR   | NR   | NR   |
| Zhou           | 2021 | MDD | 149 | 39   | NR   | 22   | 22   | 15   |

Supplementary Table 6: included immunomarkers in the included studies

| Study Name           | year | Diagnosis  | # markers | Inflammation marker                                                            |
|----------------------|------|------------|-----------|--------------------------------------------------------------------------------|
| Ali                  | 2018 | MDD        | 1         | IL-6                                                                           |
| Amin                 | 2020 | SZ         | 1         | TNF-a                                                                          |
| Asevedo              | 2013 | SZ         | 6         | CXCL-10/IP-10, CXCL-8/IL-8, CCL-11, CCL-24/Eotaxin-2, CCL-2/MCP-1, CCL-3/MIP-1 |
| Asevedo              | 2014 | SZ         | 1         | IL-2                                                                           |
| Barbosa              | 2018 | BD         | 9         | IL2, IL4,IL6,IL10,IFNg,TNFa,IL17a,sTNFR1,sTNFR2                                |
| Barbosa              | 2012 | BD         | 3         | TNF-a, TNFR1, sTNFR2                                                           |
| Belge                | 2021 | MDD        | 7         | IL6,IL1b,IFNg,CRP,IL8,TNFa, IL-10                                              |
| Bobinska             | 2016 | MDD        | 3         | TNFa, TNFRSF1A, TNFRS1B                                                        |
| Boozalis             | 2018 | SZ         | 1         | CRP                                                                            |
| Borovcanin           | 2020 | SZ         | 4         | IL-17, IL-6, TNF-a; sST2)                                                      |
| Cathomas             | 2021 | MDD,<br>SZ | 5         | TRYCATS                                                                        |
| Chakrabarty          | 2018 | BD         | 5         | IL1b,IL4,IL6,IL10,TNFa                                                         |
| Chang                | 2012 | MDD        | 1         | CRP                                                                            |
| Chung                | 2013 | BD         | 1         | hs-CRP                                                                         |
| Dal Santo            | 2020 | SZ         | 1         | CRP                                                                            |
| de Campos-Carli      | 2017 | SZ         | 2         | IL-33, sST2                                                                    |
| De Picker            | 2020 | SZ         | 12        | TRYCATS, CRP, IL6                                                              |
| Doganavsargil-Baysal | 2013 | BD         | 3         | TNFa, sTNFR1, sTNFR2                                                           |
| Dorofeikova          | 2018 | SZ         | 1         | CRP                                                                            |
| Elderkin-Thompson    | 2012 | MDD        | 2         | CRP, IL-6                                                                      |
| Ergun                | 2018 | SZ         | 2         | IL-6, TNFa                                                                     |
| Fang                 | 2019 | SZ         | 1         | IL-6                                                                           |
| Fathian              | 2019 | SZ         | 1         | CRP                                                                            |

|                          |       |        |    |                                                                                          |
|--------------------------|-------|--------|----|------------------------------------------------------------------------------------------|
| Frydecka                 | 2015a | SZ     | 2  | hs-CRP, IL-6                                                                             |
| Frydecka                 | 2015b | SZ     | 1  | TGF-b                                                                                    |
| Goldsmith                | 2016  | MDD    | 8  | TNF, IL1b, IL6,IL10, MCP1,IL1RA,IL6sr, TNFr2                                             |
| Grassi-Oliveira          | 2011  | MDD    | 2  | IL-6, TNFa                                                                               |
| Hori                     | 2016  | SZ     | 2  | IL-6, TNF-a                                                                              |
| Huang                    | 2020  | SZ     | 3  | TRP, KYN, KYNA                                                                           |
| Jin                      | 2020  | MDD    | 2  | IL-1b, IL-6                                                                              |
| Johnsen                  | 2016  | SZ     | 1  | CRP                                                                                      |
| Joseph                   | 2015  | SZ     | 1  | hs-CRP                                                                                   |
| Kindler                  | 2020  | SZ     | 10 | TRP, KYN, KYNA, 3HK, QUINA, CRP, IL-1, IL6, IL-8, IL-18                                  |
| King                     | 2021  | SZ     | 1  | IL6                                                                                      |
| Klaus                    | 2021  | SZ     | 13 | CRP, IL6, IL-10, IP-10, IFNg, TNFa, Eotaxin, MCP1, MIP1b, Fractalkine, SAA, ICAM1, VCAM1 |
| Kogan                    | 2018  | SZ     | 4  | IL-1b, IL-6, TNFa, IL-12p70                                                              |
| Kudo                     | 2018  | SZ     | 1  | sTNFR2                                                                                   |
| Lizano                   | 2019  | SZ, BD | 12 | CRP, IL6, TNFa, IL1a, IL1b, IL4, IL8, IL10, IL12, IL23, IL12p70, IFNg                    |
| Lizano                   | 2021  | SZ     | 12 | CRP, IL6, TNFa, IL1a, IL1b, IL4, IL8, IL10, IL12, IL23, IL12p70, IFNg                    |
| Malmqvist                | 2019  | SZ     | 4  | TARC/CCL17, eotaxin/CCL11, MDC/CCL22, IP-10/CXCL10                                       |
| Martinez-Cengotitabengoa | 2012  | SZ     | 1  | MCP-1                                                                                    |
| Miller                   | 2020  | SZ     | 13 | IL-6, CRP, IL17, IL1a, IL1b, IL1RA, IL4,IL6,IL8,IL10,MCP1,sCD40L,TNFa                    |
| Millet                   | 2019  | BD     | 1  | CRP                                                                                      |
| Millet                   | 2020  | BD     | 3  | TNFa sTNF-R1, sTNF-R2                                                                    |
| Milton                   | 2021  | BD     | 1  | CRP                                                                                      |
| Milton                   | 2021  | MDD    | 1  | CRP                                                                                      |
| Mora                     | 2018  | BD     | 3  | TNF-a, IL10, IL6                                                                         |
| Moustafa                 | 2020  | SZ     | 3  | IL6, IL10, CRP                                                                           |
| North                    | 2021  | SZ     | 1  | CRP                                                                                      |

|                |      |     |    |                                                                                                      |
|----------------|------|-----|----|------------------------------------------------------------------------------------------------------|
| Noyan          | 2021 | SZ  | 4  | TRP, KYN, KYNA, IL-1b                                                                                |
| Orhan          | 2018 | SZ  | 1  | IL-18                                                                                                |
| Peters         | 2019 | MDD | 3  | IL6,IL1b, TNFa                                                                                       |
| Qu             | 2019 | MDD | 3  | CRP, IL1b, IL6                                                                                       |
| Rahmani        | 2021 | BD  | 6  | CRP,IL1b, IL6, IL10, IL4, TNFa                                                                       |
| Reboucas       | 2018 | SZ  | 2  | TNF-a, IL-6                                                                                          |
| Ribeiro-Santos | 2019 | SZ  | 7  | IL2, IL4, IL6, IL10,IL17a,TNFa,IFNg                                                                  |
| Sanchez-autet  | 2018 | BD  | 1  | CRP                                                                                                  |
| Saraykar       | 2018 | MDD | 1  | IL17A                                                                                                |
| Smagula        | 2017 | MDD | 7  | TNFa, IL2, IL4, IL6, IL10, IL17, MCP-1                                                               |
| Strawbridge    | 2021 | BD  | 19 | CRP, IFNg, IL10, IL12, IL15,IL16,IL17,IL1a,IL6,IL7,IL8,IP10,MCP1,MCP4,MIP1a,MIP1b,TARC,SAA,TNFa,TNFb |
| Tanaka         | 2017 | BD  | 1  | CRP                                                                                                  |
| Tateishi       | 2020 | MDD | 3  | IL1b, IL6, TNFa                                                                                      |
| Tseng          | 2019 | BD  | 1  | CRP                                                                                                  |
| Van den Ameele | 2020 | BD  | 10 | CRP, TNF- $\alpha$ , IFN- $\gamma$ , IL-1 $\beta$ , IL-4, IL-6, TRP, KYN, KYNA, QA                   |
| Vinberg        | 2016 | MDD | 3  | hsCRP, IL18, IL6                                                                                     |
| Weiser         | 2019 | SZ  | 1  | CRP                                                                                                  |
| Wilson         | 2018 | SZ  | 1  | IFNg                                                                                                 |
| Wu             | 2016 | SZ  | 1  | I-18                                                                                                 |
| Xiu            | 2016 | SZ  | 1  | IL-10                                                                                                |
| Xiu            | 2018 | SZ  | 1  | IL-3                                                                                                 |
| Ye             | 2018 | MDD | 1  | IL6                                                                                                  |
| Zazula         | 2021 | BD  | 3  | TNF-a, sTNFR1, sTNFR2                                                                                |
| Zhang          | 2013 | SZ  | 3  | IL-1b, IL-6, TNFa                                                                                    |
| Zhang          | 2021 | SZ  | 2  | IL-1b, TNFa                                                                                          |
| Zhou           | 2021 | MDD | 3  | TRP, KYN, KA                                                                                         |

Supplementary Table 7: Overview of the cognitive domains assessed per included study

| Study Name           | year  | Diagnosis | VeM&L | ViM&L | WM | A&V | PS | La | R/P | SC | GC |
|----------------------|-------|-----------|-------|-------|----|-----|----|----|-----|----|----|
| Ali                  | 2018  | MDD       | x     |       |    | x   | x  | x  |     |    | x  |
| Amin                 | 2020  | SZ        |       |       |    |     |    |    |     |    | x  |
| Asevedo              | 2013  | SZ        | x     |       | x  |     | x  | x  | x   |    | x  |
| Asevedo              | 2014  | SZ        | x     |       | x  |     | x  | x  | x   |    | x  |
| Barbosa              | 2018  | BD        | x     |       | x  |     | x  | x  |     | x  | x  |
| Barbosa              | 2012  | BD        |       |       |    |     |    |    | x   |    |    |
| Belge                | 2021  | MDD       | x     |       |    |     | x  |    |     |    |    |
| Bobinska             | 2016  | MDD       | x     |       |    |     | x  | x  |     |    | x  |
| Boozalis             | 2018  | SZ        | x     | x     | x  | x   | x  | x  |     |    | x  |
| Borovcanin           | 2020  | SZ        |       |       |    |     |    |    |     |    | x  |
| Cathomas             | 2021  | MDD       |       |       | x  |     | x  |    |     |    | x  |
| Cathomas             | 2021  | SZ        |       |       | x  |     | x  |    |     |    | x  |
| Chakrabarty          | 2018  | BD        | x     | x     | x  | x   | x  | x  |     | x  | x  |
| Chang                | 2012  | MDD       |       |       |    | x   |    |    | x   |    | x  |
| Chung                | 2013  | BD        |       |       |    |     |    |    | x   |    |    |
| Dal Santo            | 2020  | SZ        | x     | x     | x  | x   | x  | x  | x   | x  | x  |
| de Campos-Carli      | 2017  | SZ        |       |       |    |     |    |    |     |    | x  |
| De Picker            | 2020  | SZ        |       |       | x  |     | x  |    |     |    |    |
| Doganavsargil-Baysal | 2013  | BD        | x     |       |    |     |    |    | x   |    |    |
| Dorofeikova          | 2018  | SZ        | x     |       | x  |     | x  |    | x   |    | x  |
| Elderkin-Thompson    | 2012  | MDD       | x     | x     |    | x   | x  |    | x   |    | x  |
| Ergun                | 2018  | SZ        | x     | x     | x  | x   | x  | x  | x   |    | x  |
| Fang                 | 2019  | SZ        | x     | x     |    | x   |    | x  |     |    | x  |
| Fathian              | 2019  | SZ        | x     | x     |    | x   |    | x  |     |    | x  |
| Frydecka             | 2015a | SZ        | x     |       | x  | x   | x  |    | x   |    | x  |

|                          |       |     |   |   |   |   |   |   |   |   |   |
|--------------------------|-------|-----|---|---|---|---|---|---|---|---|---|
| Frydecka                 | 2015b | SZ  | x |   | x | x | x |   | x |   | x |
| Goldsmith                | 2016  | MDD |   |   |   |   | x |   |   |   |   |
| Grassi-Oliveira          | 2011  | MDD | x |   |   |   |   |   |   |   |   |
| Hori                     | 2016  | SZ  | x |   | x | x | x |   | x |   | x |
| Huang                    | 2020  | SZ  | x | x | x | x | x |   | x | x | x |
| Jin                      | 2020  | MDD | x | x | x | x | x |   | x | x | x |
| Johnsen                  | 2016  | SZ  | x | x |   | x |   | x |   |   | x |
| Joseph                   | 2015  | SZ  |   |   |   |   |   |   |   |   |   |
| Kindler                  | 2020  | SZ  | x |   | x | x | x |   |   |   | x |
| King                     | 2021  | SZ  |   |   |   |   | x | x | x | x | x |
| Klaus                    | 2021  | SZ  |   |   |   |   | x |   |   |   |   |
| Kogan                    | 2018  | SZ  | x | x | x | x | x |   | x | x | x |
| Kudo                     | 2018  | SZ  | x | x |   |   |   |   |   |   | x |
| Lizano                   | 2019  | SZ  | x |   | x | x | x | x | x | x | x |
| Lizano                   | 2019  | BD  | x |   | x | x | x | x | x | x | x |
| Lizano                   | 2021  | SZ  | x |   | x | x | x | x | x | x | x |
| Malmqvist                | 2019  | SZ  | x | x | x | x | x |   | x | x | x |
| Martinez-Cengotitabengoa | 2012  | SZ  | x |   | x | x | x |   | x |   | x |
| Miller                   | 2020  | SZ  | x |   |   |   |   |   |   |   |   |
| Millet                   | 2019  | BD  | x | x | x | x | x |   | x | x | x |
| Millet                   | 2020  | BD  | x | x | x | x | x |   | x | x | x |
| Milton                   | 2021  | BD  |   | x |   |   | x |   |   |   | x |
| Milton                   | 2021  | MDD |   | x |   |   | x |   |   |   | x |
| Mora                     | 2018  | BD  | x | x |   | x | x | x |   |   | x |
| Moustafa                 | 2020  | SZ  | x |   | x |   | x | x | x |   | x |
| North                    | 2021  | SZ  | x | x |   | x |   | x |   |   | x |
| Noyan                    | 2021  | SZ  |   |   |   |   | x |   | x |   | x |
| Orhan                    | 2018  | SZ  | x | x | x | x | x |   | x | x | x |

|                |      |     |   |   |   |   |   |   |   |  |   |
|----------------|------|-----|---|---|---|---|---|---|---|--|---|
| Peters         | 2019 | MDD |   |   |   | x | x |   |   |  |   |
| Qu             | 2019 | MDD |   |   |   |   |   |   |   |  | x |
| Rahmani        | 2021 | BD  |   |   |   |   |   | x | x |  | x |
| Reboucas       | 2018 | SZ  | x |   |   |   |   |   |   |  |   |
| Ribeiro-Santos | 2019 | SZ  | x |   | x |   | x |   | x |  | x |
| Sanchez-autet  | 2018 | BD  | x |   | x |   | x | x |   |  |   |
| Saraykar       | 2018 | MDD | x | x |   | x |   |   | x |  | x |
| Smagula        | 2017 | MDD |   |   |   |   | x |   |   |  |   |
| Strawbridge    | 2021 | BD  | x |   | x |   | x |   | x |  |   |
| Tanaka         | 2017 | BD  |   |   |   |   |   |   |   |  | x |
| Tateishi       | 2020 | MDD |   |   |   |   | x | x | x |  | x |
| Tseng          | 2019 | BD  |   |   |   | x |   |   | x |  | x |
| Van den Ameele | 2020 | BD  |   |   | x |   | x |   |   |  | x |
| Vinberg        | 2016 | MDD | x |   |   |   |   |   |   |  |   |
| Weiser         | 2019 | SZ  | x | x | x |   | x |   | x |  | x |
| Wilson         | 2018 | SZ  | x | x |   | x |   | x |   |  | x |
| Wu             | 2016 | SZ  | x | x |   | x |   | x |   |  | x |
| Xiu            | 2016 | SZ  | x | x |   | x |   | x |   |  | x |
| Xiu            | 2018 | SZ  | x | x |   | x |   | x |   |  | x |
| Ye             | 2018 | MDD |   | x |   | x |   | x |   |  |   |
| Zazula         | 2021 | BD  | x | x | x | x | x |   | x |  | x |
| Zhang          | 2013 | SZ  | x | x | x | x | x |   | x |  | x |
| Zhang          | 2021 | SZ  | x | x | x | x | x |   | x |  | x |
| Zhou           | 2021 | MDD | x | x | x |   | x |   |   |  | x |

Legend: VeM&L: Verbal Memory and Learning; ViM&L: Visual Memory and Learning; WM: Working Memory; A&V: Attention and Vigilance; PS:

Processing Speed; La: Language; R/P: Reasoning/Problem Solving; SC: Social Cognition; GC: Global Cognition



Supplementary Table 8: BIOCROSS quality assessment of the included studies

| Study Name           | year | 1. Hypothesis | 2. Study pop. sel | 3. St pop rep | 4. Study pop char | 5. Stat. analysis | 6. Context-specific disc. | 7. Study limit. | 8. assay methods | 9. Labo meas. | 10. Biomarker data modeling | SUM | Quality  |
|----------------------|------|---------------|-------------------|---------------|-------------------|-------------------|---------------------------|-----------------|------------------|---------------|-----------------------------|-----|----------|
| Ali                  | 2018 | 1             | 1                 | 1             | 0                 | 0                 | 1                         | 1               | 0                | 0             | 0                           | 5   | Moderate |
| Amin                 | 2020 | 1             | 1                 | 1             | 0                 | 0                 | 1                         | 1               | 0                | 0             | 0                           | 5   | Moderate |
| Asevedo              | 2013 | 1             | 1                 | 0             | 1                 | 1                 | 1                         | 1               | 1                | 0             | 1                           | 8   | High     |
| Asevedo              | 2014 | 1             | 1                 | 0             | 1                 | 1                 | 1                         | 1               | 0                | 0             | 0                           | 6   | Moderate |
| Barbosa              | 2018 | 1             | 1                 | 0             | 0                 | 1                 | 1                         | 1               | 1                | 0             | 0                           | 6   | Moderate |
| Barbosa              | 2012 | 1             | 1                 | 0             | 1                 | 0                 | 1                         | 0               | 1                | 0             | 1                           | 6   | Moderate |
| Belge                | 2021 | 1             | 1                 | 0             | 0                 | 0                 | 1                         | 0               | 1                | 0             | 0                           | 4   | Moderate |
| Bobinska             | 2016 | 1             | 1                 | 0             | 0                 | 0                 | 1                         | 0               | 1                | 0             | 0                           | 4   | Moderate |
| Boozalis             | 2018 | 1             | 1                 | 0             | 1                 | 1                 | 1                         | 1               | 0                | 0             | 0                           | 6   | Moderate |
| Borovcanin           | 2020 | 1             | 1                 | 0             | 1                 | 0                 | 1                         | 1               | 0                | 0             | 0                           | 5   | Moderate |
| Cathomas             | 2021 | 1             | 1                 | 0             | 1                 | 1                 | 1                         | 0               | 1                | 0             | 0                           | 6   | Moderate |
| Chakrabarty          | 2018 | 1             | 1                 | 0             | 0                 | 1                 | 1                         | 1               | 0                | 0             | 1                           | 6   | Moderate |
| Chang                | 2012 | 1             | 1                 | 1             | 1                 | 1                 | 1                         | 1               | 1                | 0             | 1                           | 9   | High     |
| Chung                | 2013 | 1             | 1                 | 0             | 1                 | 1                 | 1                         | 0               | 1                | 0             | 0                           | 6   | Moderate |
| Dal Santo            | 2020 | 1             | 1                 | 1             | 1                 | 1                 | 1                         | 1               | 0                | 0             | 0                           | 7   | High     |
| de Campos-Carli      | 2017 | 1             | 1                 | 0             | 1                 | 1                 | 1                         | 0               | 1                | 0             | 0                           | 6   | Moderate |
| De Picker            | 2020 | 1             | 1                 | 0             | 1                 | 1                 | 1                         | 1               | 1                | 0             | 1                           | 8   | High     |
| Doganavsargil-Baysal | 2013 | 1             | 1                 | 1             | 1                 | 1                 | 1                         | 1               | 0                | 0             | 1                           | 8   | High     |
| Dorofeikova          | 2018 | 1             | 1                 | 0             | 0                 | 0                 | 1                         | 1               | 0                | 0             | 0                           | 4   | Moderate |
| Elderkin-Thompson    | 2012 | 1             | 1                 | 0             | 1                 | 1                 | 1                         | 1               | 1                | 0             | 0                           | 7   | High     |
| Ergun                | 2018 | 1             | 1                 | 0             | 1                 | 1                 | 1                         | 1               | 0                | 0             | 1                           | 7   | High     |
| Fang                 | 2019 | 1             | 1                 | 1             | 1                 | 1                 | 1                         | 1               | 1                | 0             | 1                           | 9   | High     |
| Fathian              | 2019 | 1             | 1                 | 0             | 1                 | 1                 | 1                         | 1               | 1                | 0             | 0                           | 7   | High     |

|                          |       |   |   |   |   |   |   |   |   |   |   |   |          |
|--------------------------|-------|---|---|---|---|---|---|---|---|---|---|---|----------|
| Frydecka                 | 2015b | 1 | 1 | 0 | 1 | 1 | 1 | 1 | 1 | 0 | 0 | 7 | High     |
| Frydecka                 | 2015a | 1 | 1 | 0 | 0 | 1 | 1 | 0 | 1 | 1 | 0 | 6 | Moderate |
| Goldsmith                | 2016  | 1 | 1 | 0 | 0 | 1 | 1 | 0 | 1 | 0 | 0 | 5 | Moderate |
| Grassi-Oliveira          | 2011  | 1 | 1 | 0 | 1 | 1 | 1 | 1 | 1 | 0 | 0 | 7 | High     |
| Hori                     | 2016  | 1 | 1 | 1 | 0 | 1 | 1 | 1 | 1 | 0 | 0 | 7 | High     |
| Huang                    | 2020  | 1 | 1 | 0 | 0 | 1 | 1 | 0 | 0 | 0 | 0 | 4 | Moderate |
| Jin                      | 2020  | 1 | 1 | 0 | 1 | 1 | 1 | 0 | 1 | 0 | 1 | 7 | High     |
| Johnsen                  | 2016  | 1 | 1 | 0 | 1 | 1 | 1 | 0 | 1 | 0 | 0 | 6 | Moderate |
| Joseph                   | 2015  | 1 | 1 | 0 | 1 | 1 | 1 | 1 | 0 | 0 | 0 | 6 | Moderate |
| Kindler                  | 2020  | 1 | 1 | 0 | 0 | 0 | 1 | 1 | 1 | 0 | 1 | 6 | Moderate |
| King                     | 2021  | 1 | 1 | 0 | 1 | 1 | 1 | 1 | 1 | 0 | 0 | 7 | High     |
| Klaus                    | 2021  | 1 | 1 | 0 | 0 | 1 | 1 | 1 | 0 | 0 | 0 | 5 | Moderate |
| Kogan                    | 2018  | 1 | 1 | 0 | 1 | 0 | 1 | 0 | 1 | 0 | 0 | 5 | Moderate |
| Kudo                     | 2018  | 1 | 1 | 0 | 1 | 1 | 1 | 0 | 1 | 1 | 1 | 8 | High     |
| Lizano                   | 2019  | 1 | 1 | 0 | 1 | 1 | 1 | 1 | 1 | 0 | 0 | 7 | High     |
| Lizano                   | 2021  | 1 | 1 | 0 | 1 | 1 | 1 | 1 | 1 | 1 | 1 | 9 | High     |
| Malmqvist                | 2019  | 1 | 1 | 0 | 1 | 1 | 1 | 0 | 1 | 1 | 0 | 7 | High     |
| Martinez-Cengotitabengoa | 2012  | 1 | 1 | 0 | 0 | 1 | 1 | 0 | 1 | 0 | 0 | 5 | Moderate |
| Miller                   | 2020  | 1 | 1 | 1 | 1 | 1 | 1 | 0 | 1 | 0 | 0 | 7 | High     |
| Millet                   | 2019  | 1 | 1 | 1 | 1 | 1 | 1 | 1 | 1 | 1 | 0 | 9 | High     |
| Millet                   | 2020  | 1 | 1 | 0 | 1 | 1 | 1 | 0 | 1 | 0 | 0 | 6 | Moderate |
| Milton                   | 2021  | 1 | 1 | 1 | 1 | 1 | 1 | 0 | 1 | 0 | 0 | 7 | High     |
| Mora                     | 2018  | 1 | 1 | 0 | 1 | 1 | 1 | 1 | 1 | 0 | 1 | 8 | High     |
| Moustafa                 | 2020  | 1 | 1 | 1 | 1 | 1 | 1 | 0 | 1 | 0 | 1 | 8 | High     |
| North                    | 2021  | 1 | 1 | 0 | 1 | 1 | 1 | 1 | 1 | 0 | 0 | 7 | High     |
| Noyan                    | 2021  | 1 | 1 | 0 | 1 | 1 | 1 | 1 | 1 | 0 | 0 | 7 | High     |
| Orhan                    | 2018  | 1 | 1 | 0 | 0 | 1 | 1 | 0 | 0 | 0 | 0 | 4 | Low      |

|                |      |   |   |   |   |   |   |   |   |   |   |   |          |
|----------------|------|---|---|---|---|---|---|---|---|---|---|---|----------|
| Peters         | 2019 | 1 | 1 | 0 | 1 | 1 | 1 | 1 | 1 | 0 | 1 | 8 | High     |
| Qu             | 2019 | 1 | 1 | 0 | 1 | 1 | 1 | 1 | 1 | 0 | 0 | 7 | High     |
| Rahmani        | 2021 | 1 | 1 | 1 | 1 | 1 | 1 | 1 | 0 | 0 | 1 | 8 | High     |
| Reboucas       | 2018 | 1 | 1 | 0 | 1 | 1 | 1 | 0 | 1 | 0 | 0 | 6 | Moderate |
| Ribeiro-Santos | 2019 | 1 | 1 | 0 | 0 | 1 | 1 | 1 | 1 | 1 | 0 | 7 | High     |
| Sanchez-autet  | 2018 | 1 | 1 | 0 | 1 | 1 | 1 | 0 | 0 | 0 | 0 | 5 | Moderate |
| Saraykar       | 2018 | 1 | 1 | 0 | 0 | 1 | 1 | 1 | 1 | 0 | 0 | 6 | Moderate |
| Samagula       | 2017 | 1 | 1 | 0 | 1 | 1 | 1 | 1 | 1 | 0 | 1 | 8 | High     |
| Strawbridge    | 2021 | 1 | 1 | 0 | 1 | 1 | 1 | 1 | 1 | 0 | 1 | 8 | High     |
| Tanaka         | 2017 | 1 | 1 | 0 | 1 | 1 | 1 | 1 | 0 | 0 | 0 | 6 | Moderate |
| Tateishi       | 2020 | 1 | 1 | 0 | 0 | 0 | 1 | 0 | 1 | 1 | 0 | 5 | Moderate |
| Tseng          | 2019 | 1 | 1 | 0 | 1 | 1 | 1 | 1 | 0 | 0 | 0 | 6 | Moderate |
| Van den Ameele | 2020 | 1 | 1 | 0 | 0 | 1 | 1 | 1 | 1 | 1 | 0 | 7 | High     |
| Vinberg        | 2016 | 1 | 1 | 0 | 0 | 0 | 1 | 0 | 1 | 1 | 0 | 5 | Moderate |
| Weiser         | 2019 | 1 | 1 | 1 | 0 | 1 | 1 | 1 | 1 | 0 | 0 | 7 | High     |
| Wilson         | 2018 | 1 | 1 | 1 | 1 | 1 | 1 | 0 | 0 | 0 | 0 | 6 | Moderate |
| Wu             | 2016 | 1 | 1 | 0 | 1 | 1 | 1 | 1 | 1 | 1 | 0 | 8 | High     |
| Xiu            | 2016 | 1 | 1 | 0 | 1 | 1 | 1 | 1 | 1 | 0 | 0 | 7 | High     |
| Xiu            | 2018 | 1 | 1 | 0 | 1 | 1 | 1 | 0 | 0 | 1 | 0 | 6 | Moderate |
| Ye             | 2018 | 1 | 1 | 0 | 0 | 0 | 1 | 1 | 1 | 1 | 1 | 7 | High     |
| Zazula         | 2021 | 1 | 1 | 0 | 1 | 1 | 1 | 0 | 0 | 0 | 0 | 5 | Moderate |
| Zhang          | 2013 | 1 | 1 | 0 | 1 | 1 | 1 | 0 | 1 | 1 | 0 | 7 | High     |
| Zhang          | 2021 | 1 | 1 | 0 | 0 | 1 | 1 | 0 | 0 | 0 | 0 | 4 | Low      |
| Zhou           | 2021 | 1 | 1 | 0 | 1 | 1 | 1 | 0 | 1 | 0 | 0 | 6 | Moderate |

Supplementary Figure 1: PRISMA Flowchart

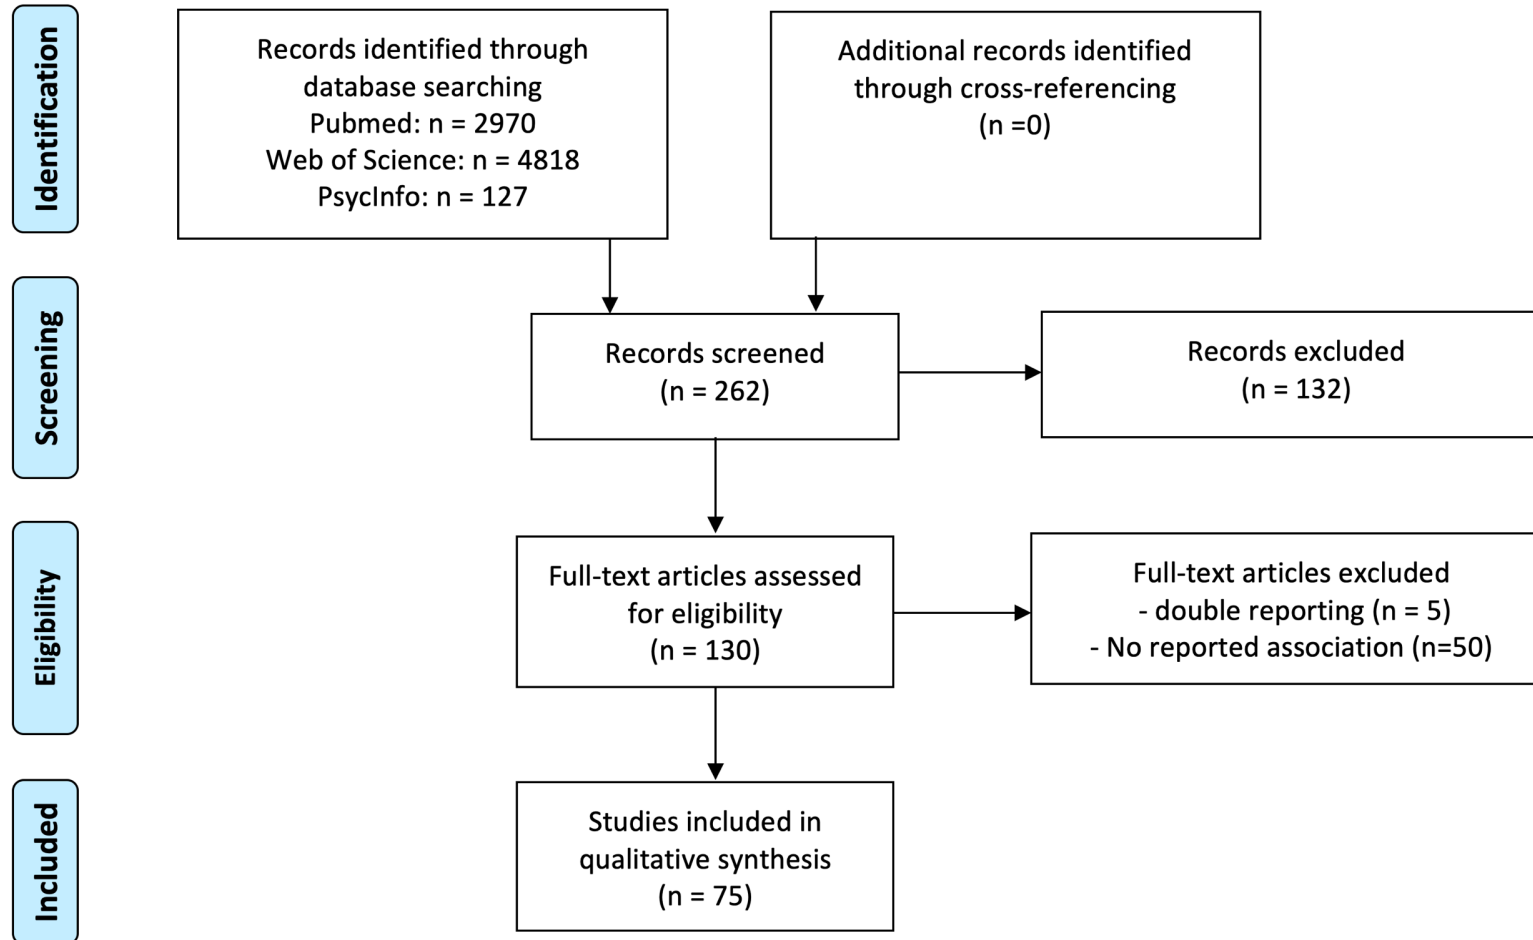

Supplementary Figure 2: Forest Plot for correlation studies between Pro Inflammatory Index (PII) and Global Cognition for all studies, as well as diagnostic subgroups (Bipolar Disorder (BD), Major Depressive Disorder (MDD), and schizophrenia spectrum disorders (SZ))

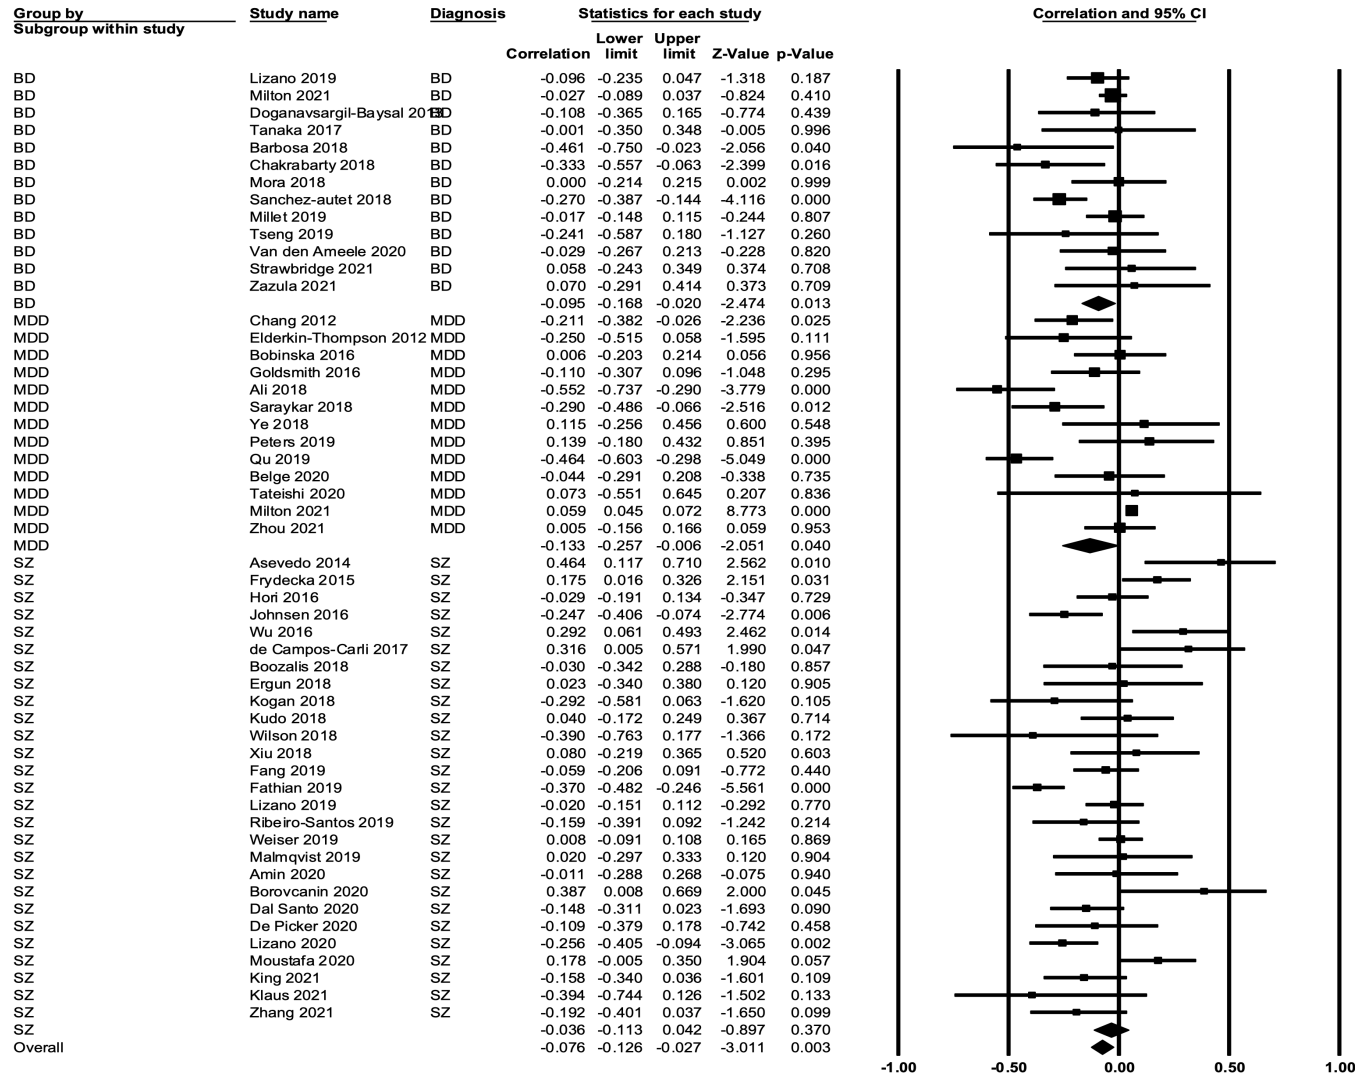

Supplementary Figure 3: Forest Plot for correlation studies between Pro Inflammatory Index (PII) and Cognitive Domain Attention for all studies, as well as diagnostic subgroups (Bipolar Disorder (BD), Major Depressive Disorder (MDD), and schizophrenia spectrum disorders (SZ))

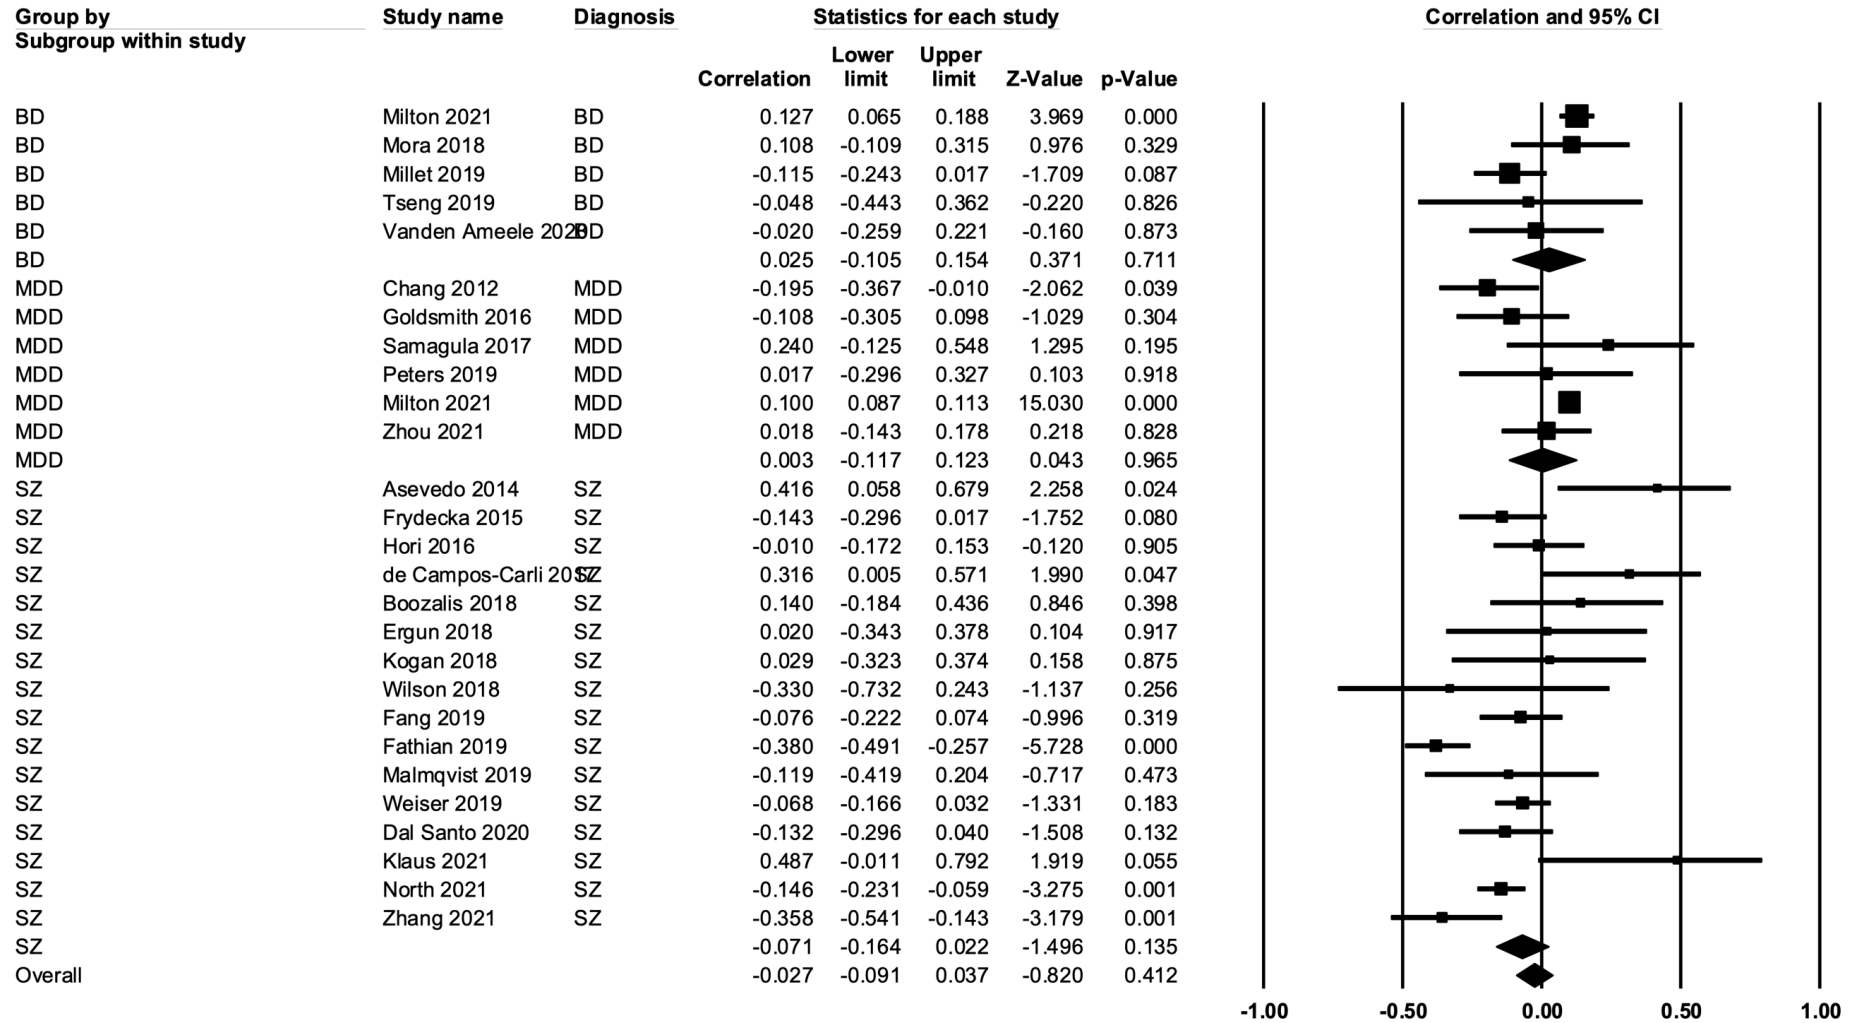

Supplementary Figure 4: Forest Plot for correlation studies between Pro Inflammatory Index (PII) and cognitive domain Language for all studies, as well as diagnostic subgroups (Bipolar Disorder (BD), Major Depressive Disorder (MDD), and schizophrenia spectrum disorders (SZ))

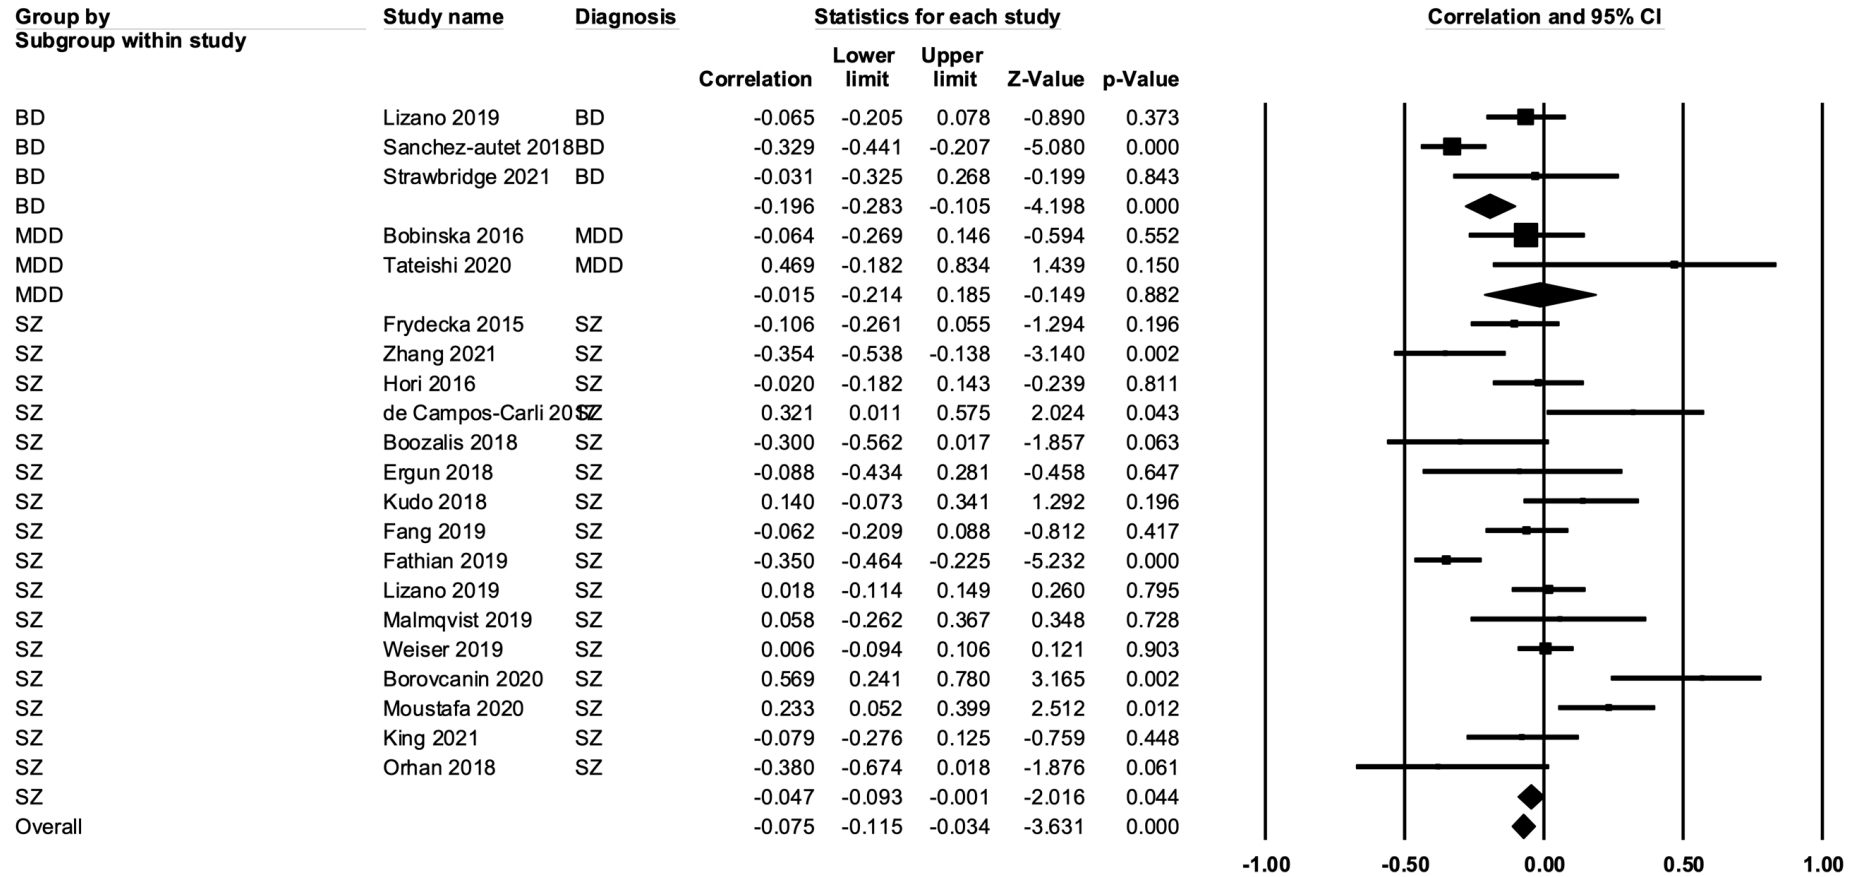

Supplementary Figure 5: Forest Plot for correlation studies between Pro Inflammatory Index (PII) and cognitive domain Processing Speed for all studies, as well as diagnostic subgroups (Bipolar Disorder (BD), Major Depressive Disorder (MDD), and schizophrenia spectrum disorders (SZ))

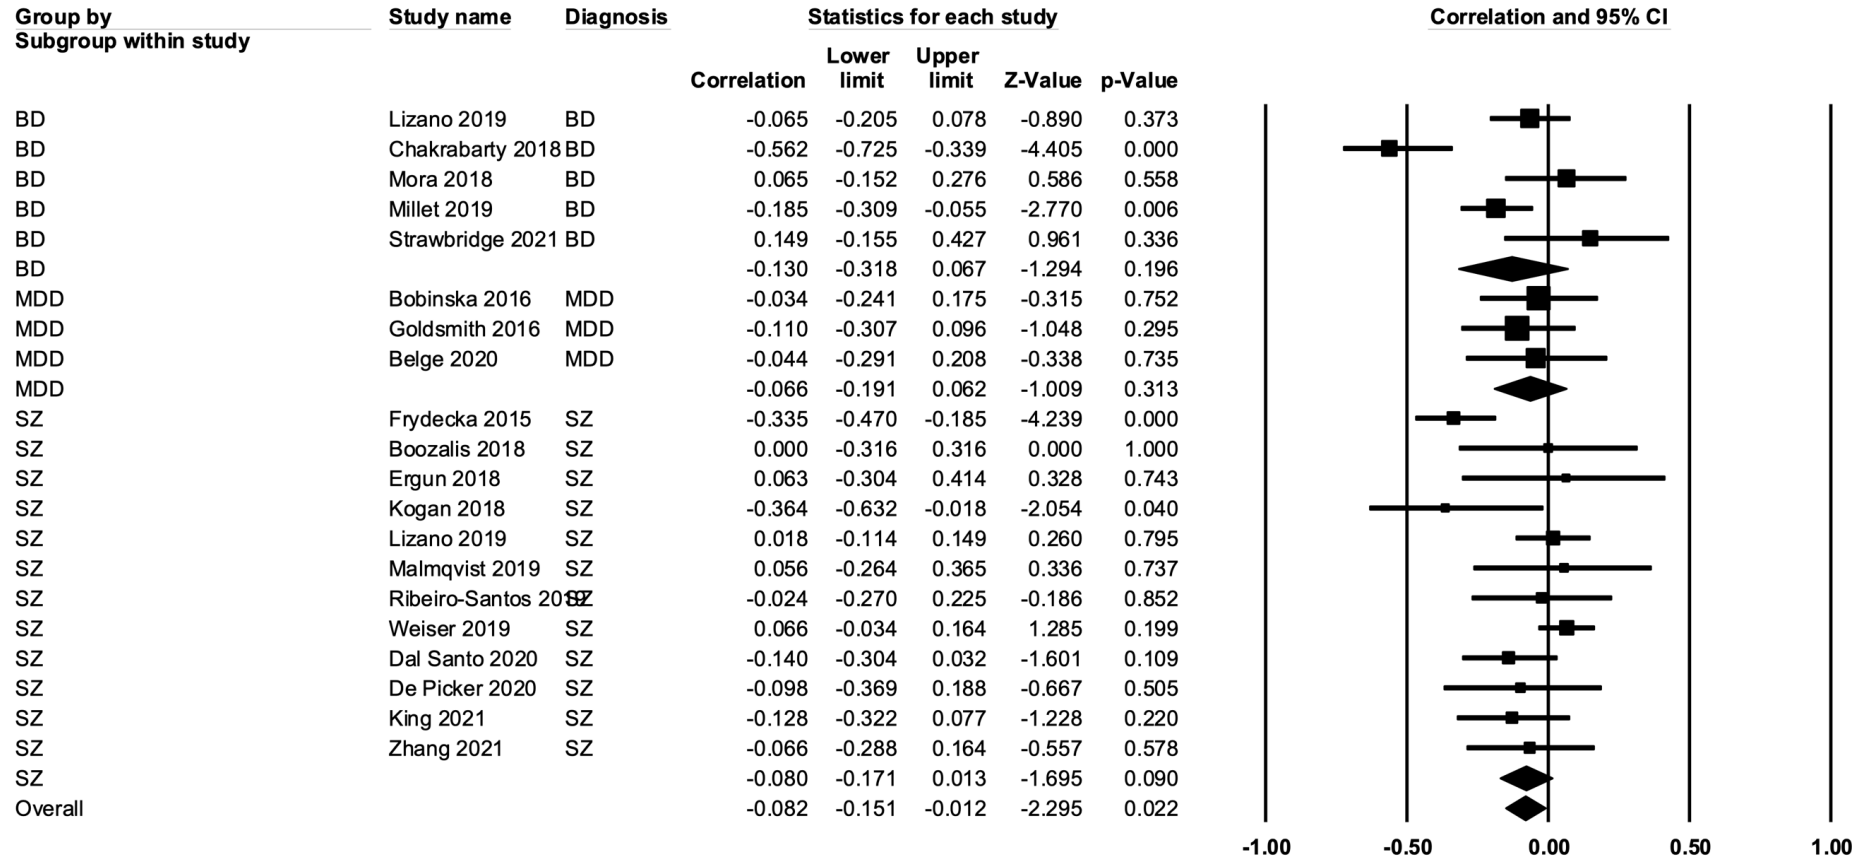



Supplementary Figure 6: Forest Plot for correlation studies between Pro Inflammatory Index (PII) and cognitive domain Reasoning for all studies, as well as diagnostic subgroups (Bipolar Disorder (BD), Major Depressive Disorder (MDD), and schizophrenia spectrum disorders (SZ))

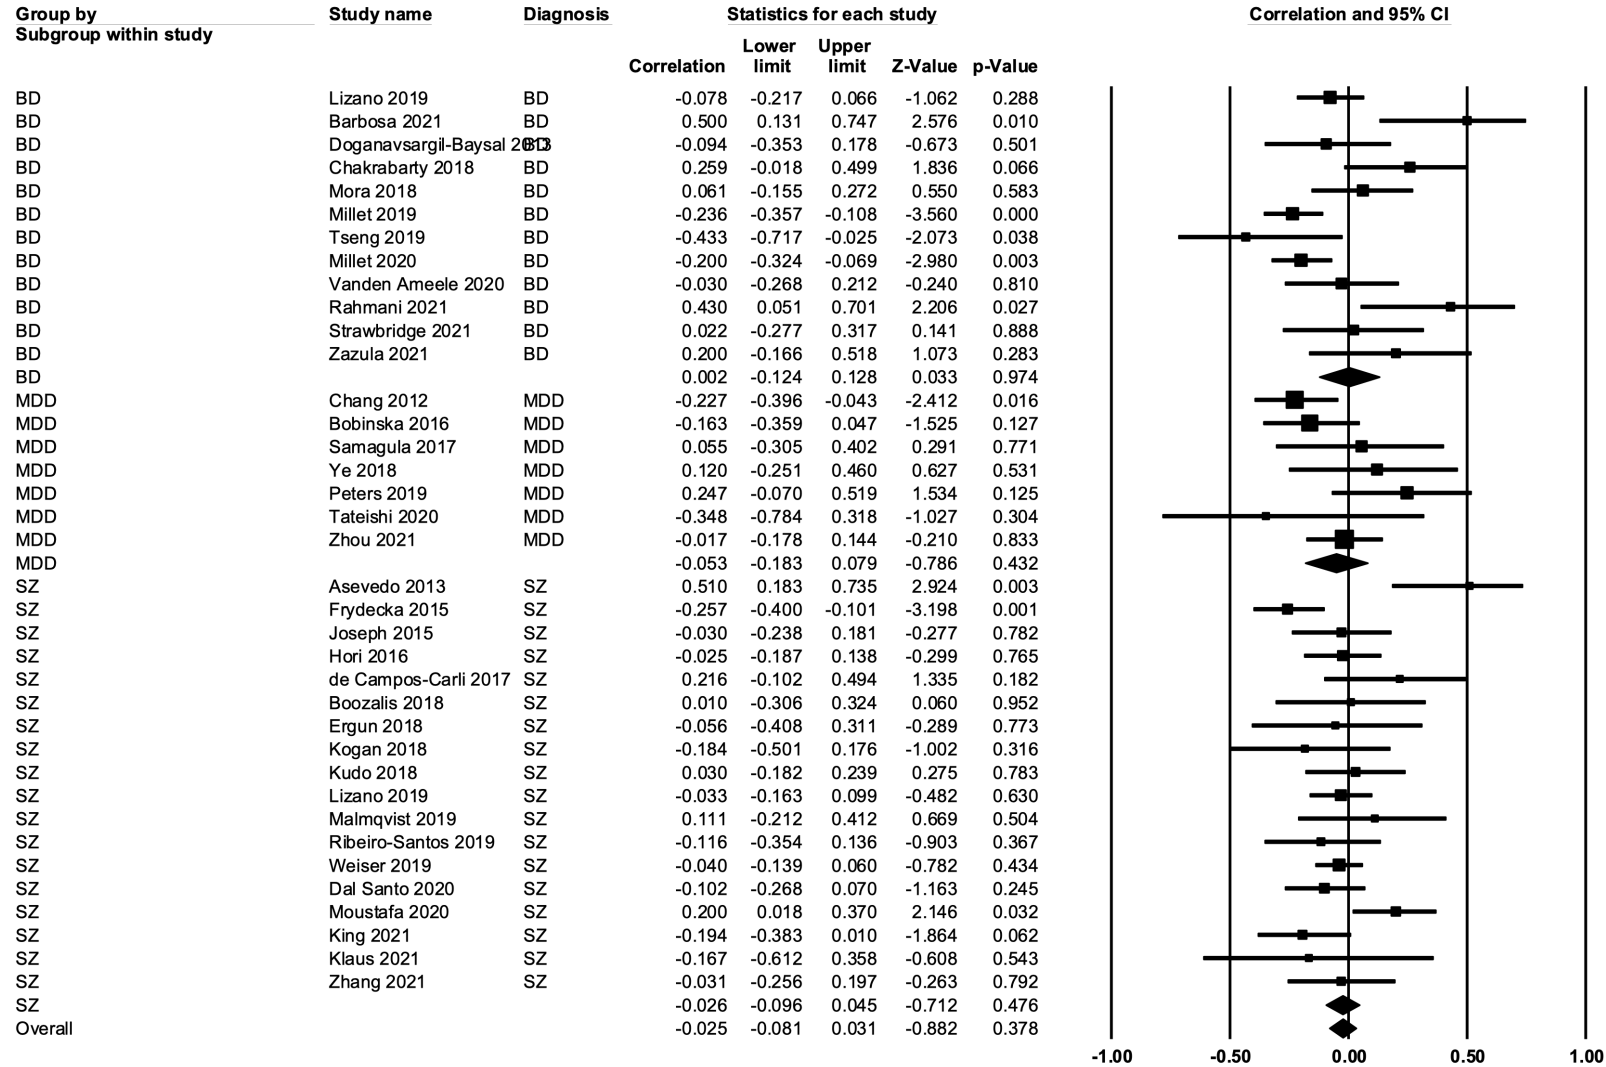

Supplementary Figure 7: Forest Plot for correlation studies between Pro Inflammatory Index (PII) and cognitive domain Verbal Memory for all studies, as well as diagnostic subgroups (Bipolar Disorder (BD), Major Depressive Disorder (MDD), and schizophrenia spectrum disorders (SZ))

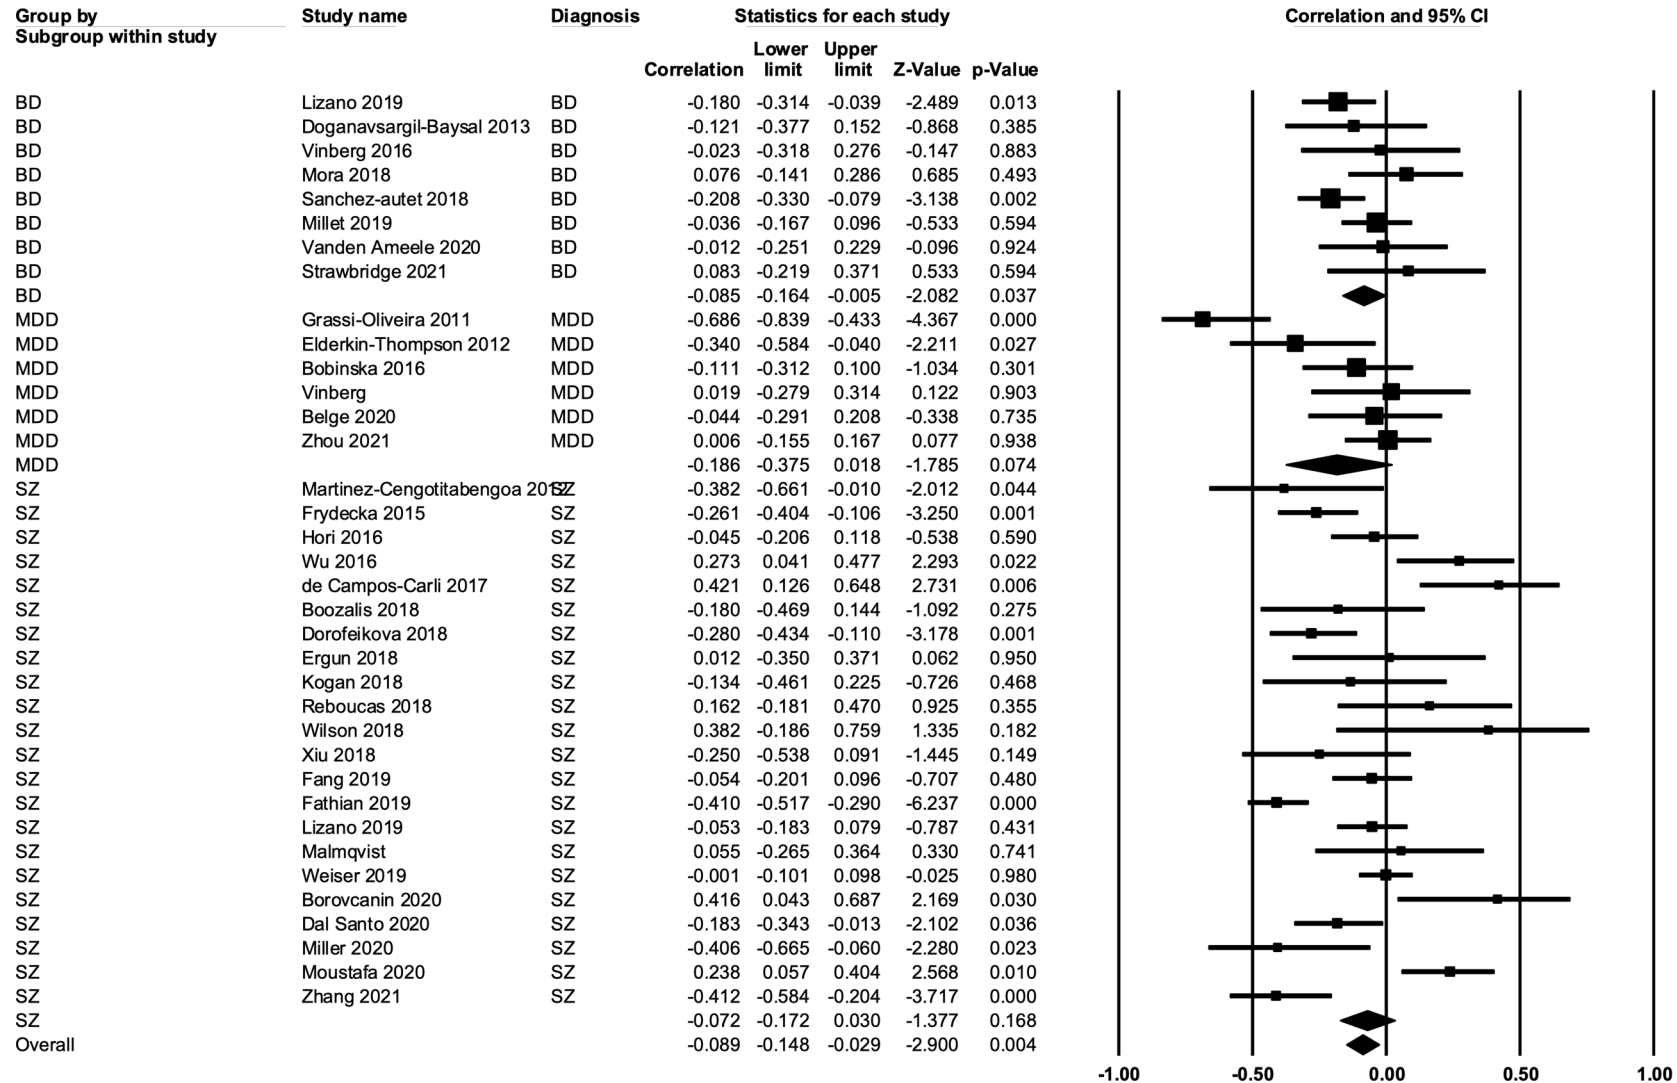

Supplementary Figure 8: Forest Plot for correlation studies between Pro Inflammatory Index (PII) and cognitive domain Visual Memory for all studies, as well as diagnostic subgroups (Bipolar Disorder (BD), Major Depressive Disorder (MDD), and schizophrenia spectrum disorders (SZ))

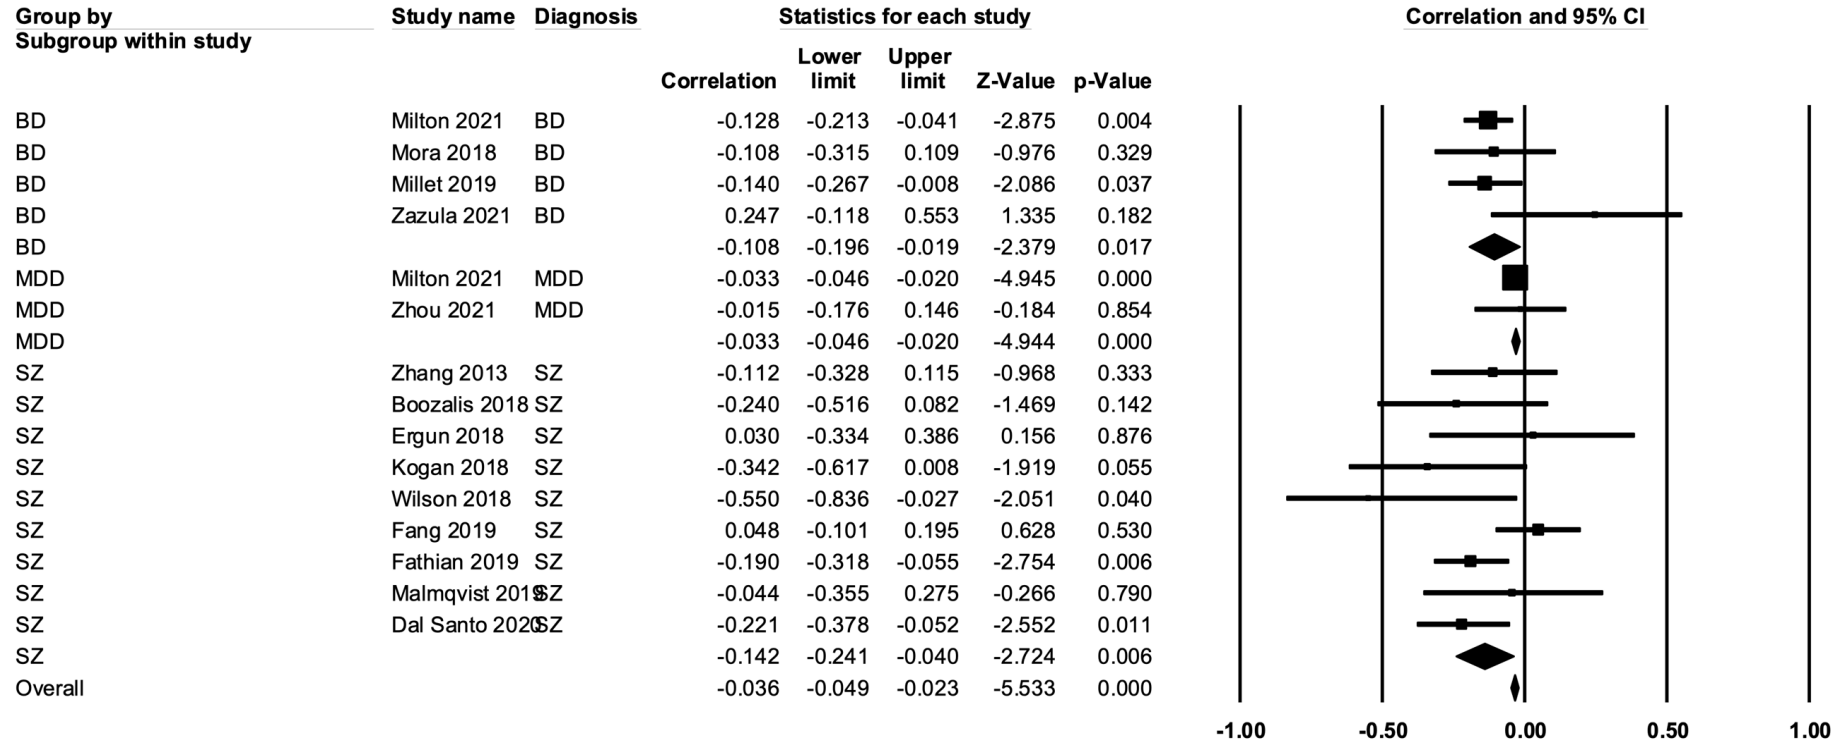

Supplementary Figure 9: Forest Plot for correlation studies between Pro Inflammatory Index (PII) and cognitive domain Working Memory for all studies, as well as diagnostic subgroups (Bipolar Disorder (BD), Major Depressive Disorder (MDD), and schizophrenia spectrum disorders (SZ))

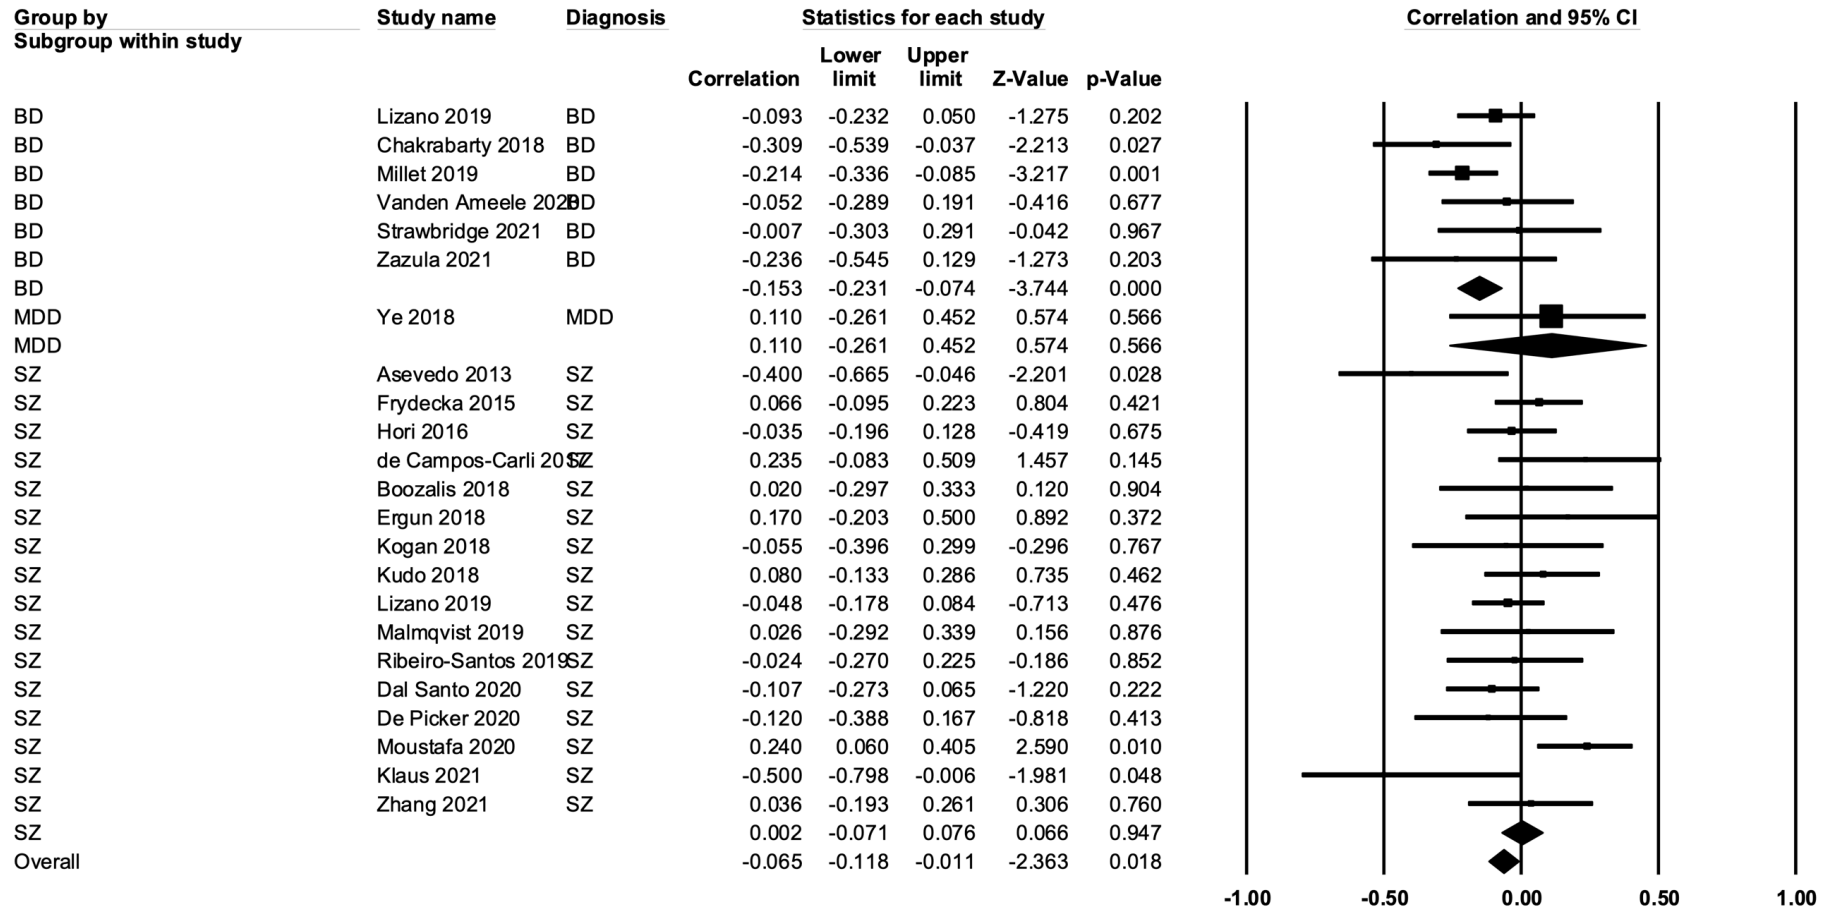

Supplementary Figure 10: Forest Plot for correlation studies between Anti Inflammatory Index (AII) and Global Cognition for all studies, as well as diagnostic subgroups (Bipolar Disorder (BD), Major Depressive Disorder (MDD), and schizophrenia spectrum disorders (SZ))

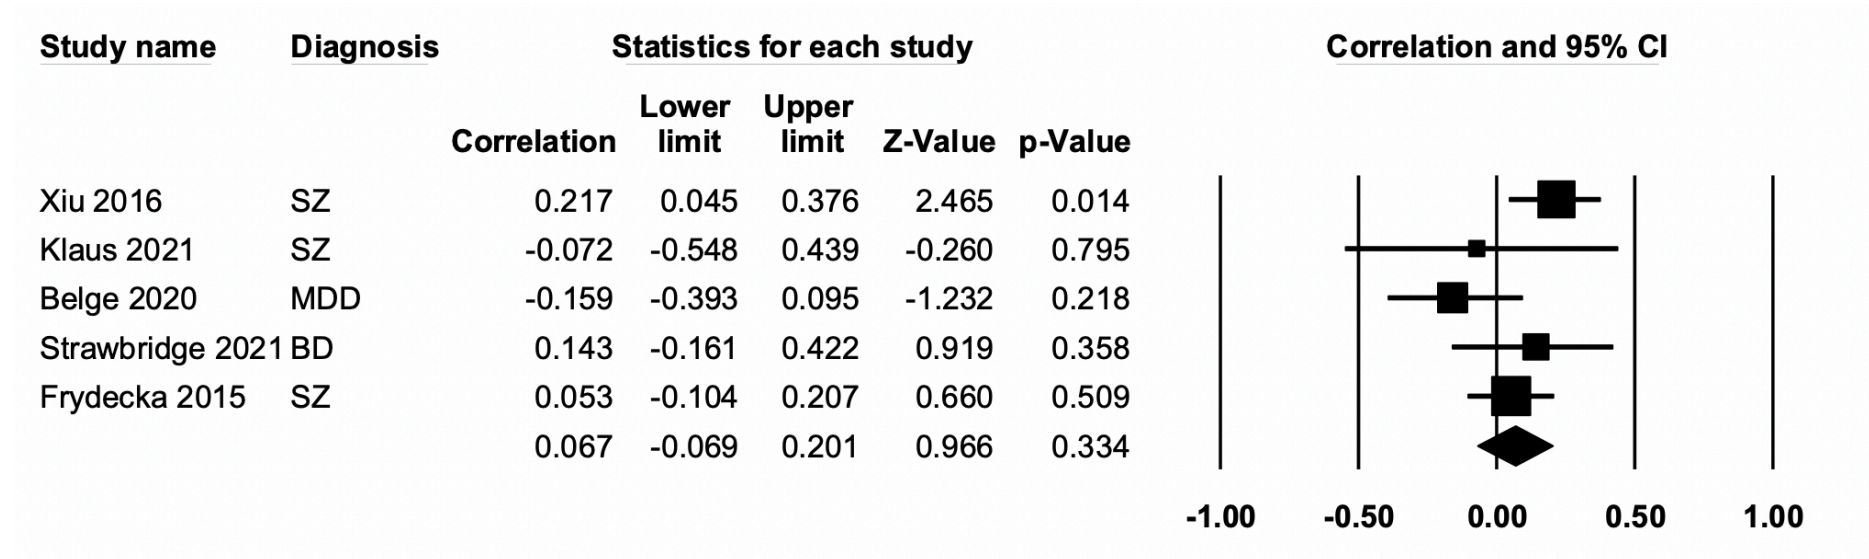

Supplementary Figure 11: Forest Plot for correlation studies between Anti Inflammatory Index (AII) and Cognitive Domain Language for all studies, as well as diagnostic subgroups (Bipolar Disorder (BD), Major Depressive Disorder (MDD), and schizophrenia spectrum disorders (SZ))

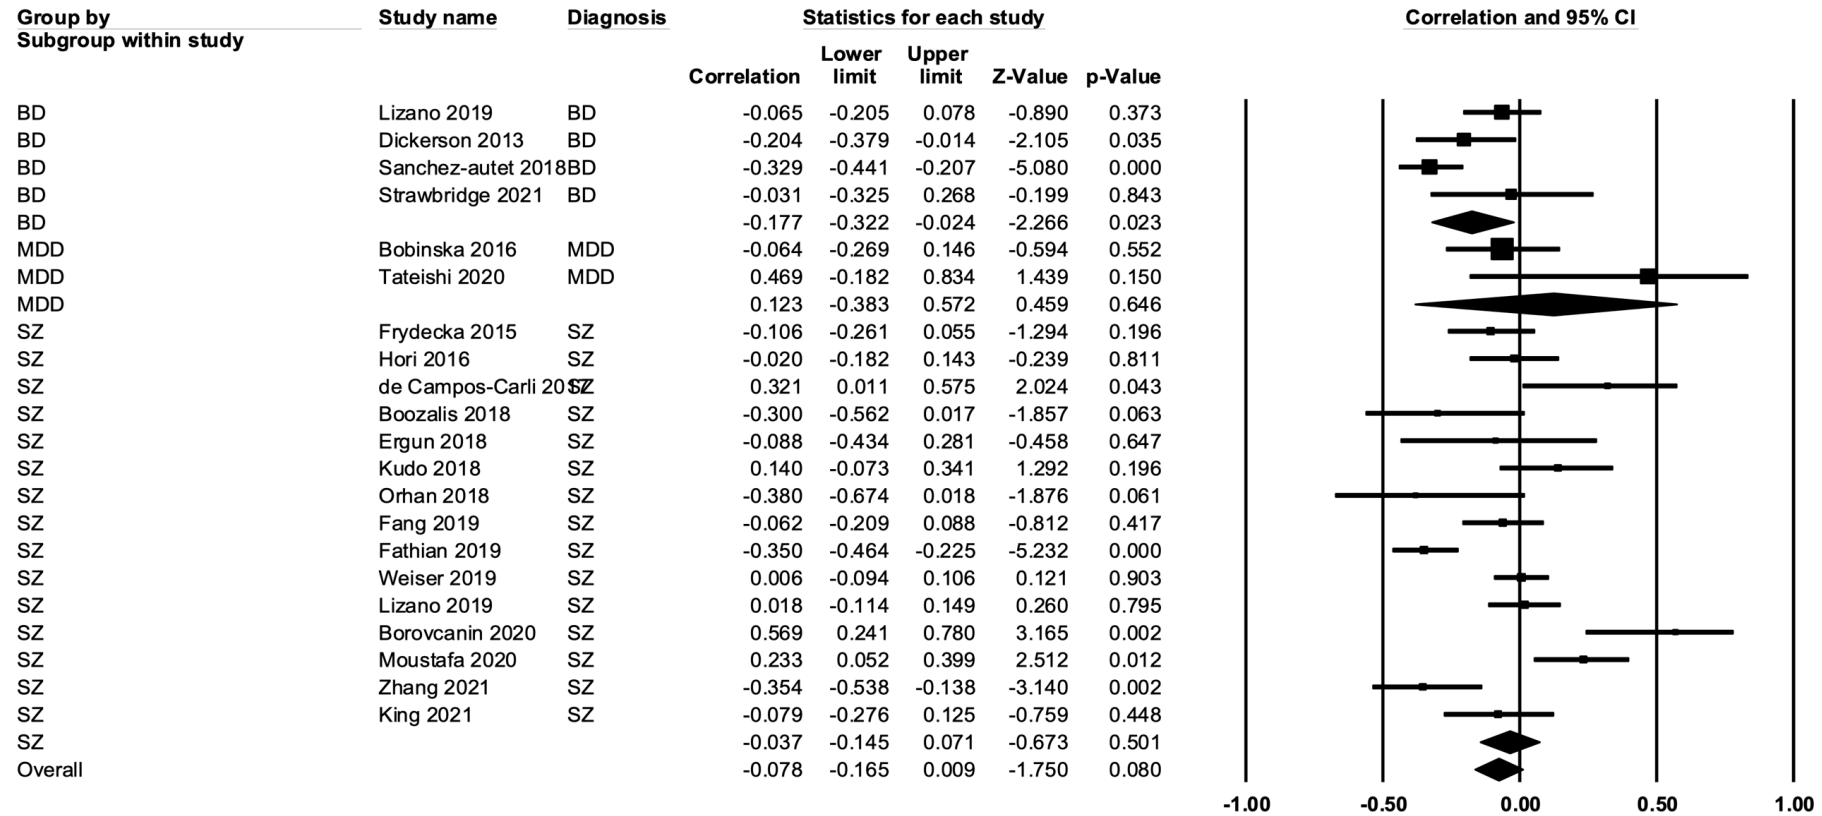

Supplementary Figure 12: Forest Plot for correlation studies between Anti Inflammatory Index (AII) and Cognitive Domain Processing Speed for all studies, as well as diagnostic subgroups (Bipolar Disorder (BD), Major Depressive Disorder (MDD), and schizophrenia spectrum disorders (SZ))

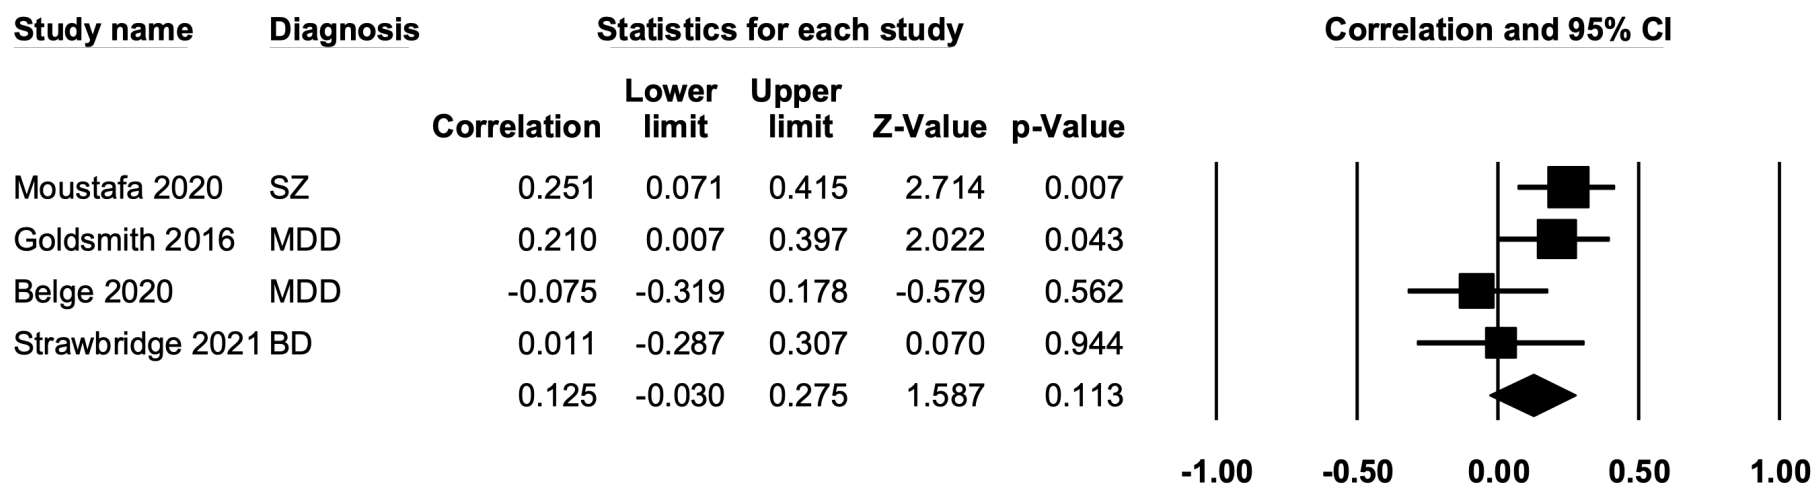

Supplementary Figure 13: Forest Plot for correlation studies between Anti Inflammatory Index (AII) and Cognitive Domain Reasoning for all studies, as well as diagnostic subgroups (Bipolar Disorder (BD), Major Depressive Disorder (MDD), and schizophrenia spectrum disorders (SZ))

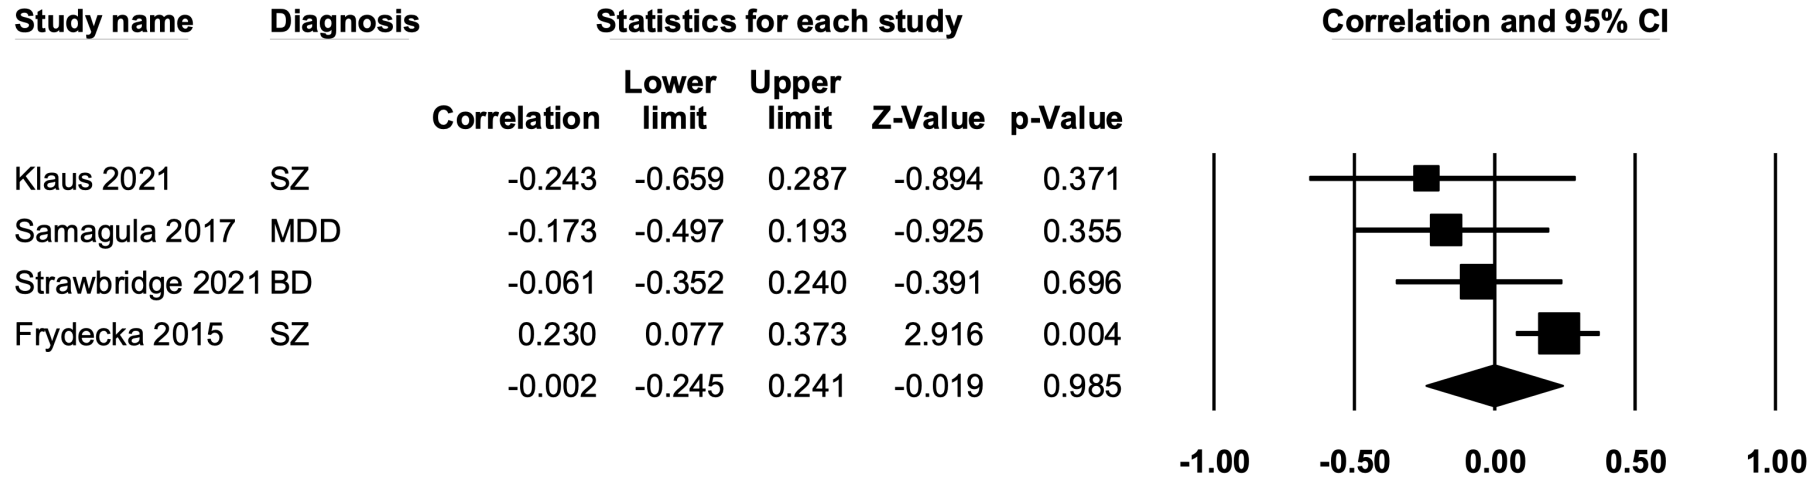



Supplementary Figure 14: Forest Plot for correlation studies between Anti Inflammatory Index (AII) and Cognitive Domain Verbal Memory for all studies, as well as diagnostic subgroups (Bipolar Disorder (BD), Major Depressive Disorder (MDD), and schizophrenia spectrum disorders (SZ))

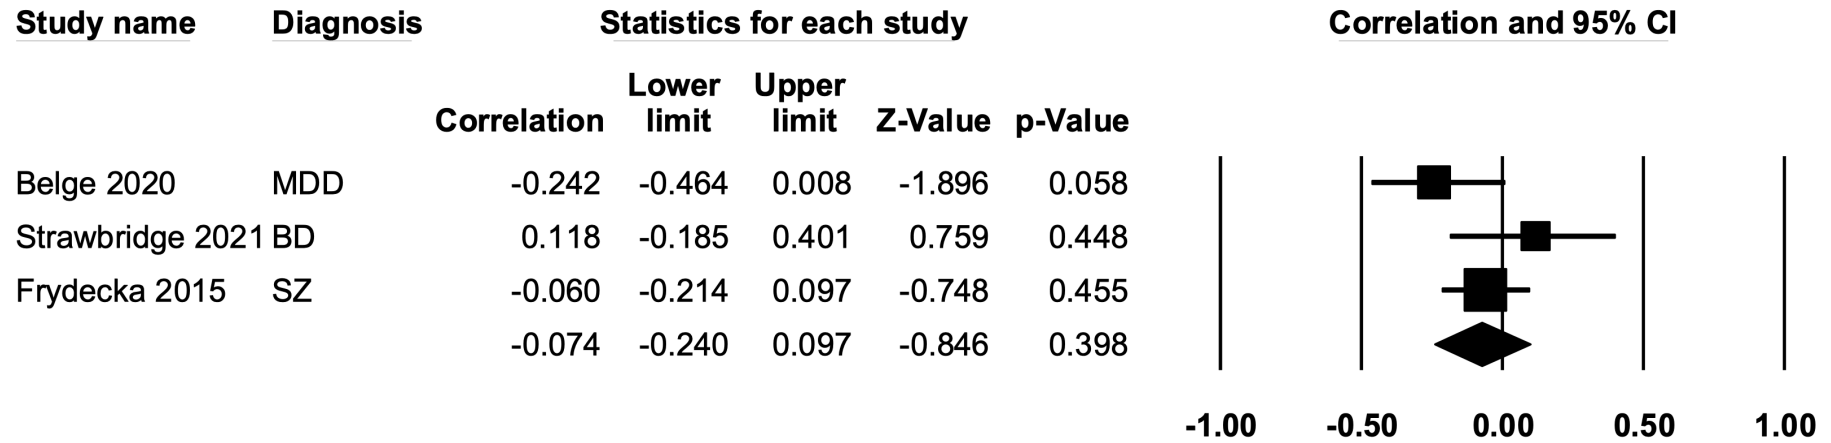

Supplementary Figure 15: Forest Plot for correlation studies between C Reactive Protein (CRP) and Global Cognition for all studies, as well as diagnostic subgroups (Bipolar Disorder (BD), Major Depressive Disorder (MDD), and schizophrenia spectrum disorders (SZ))

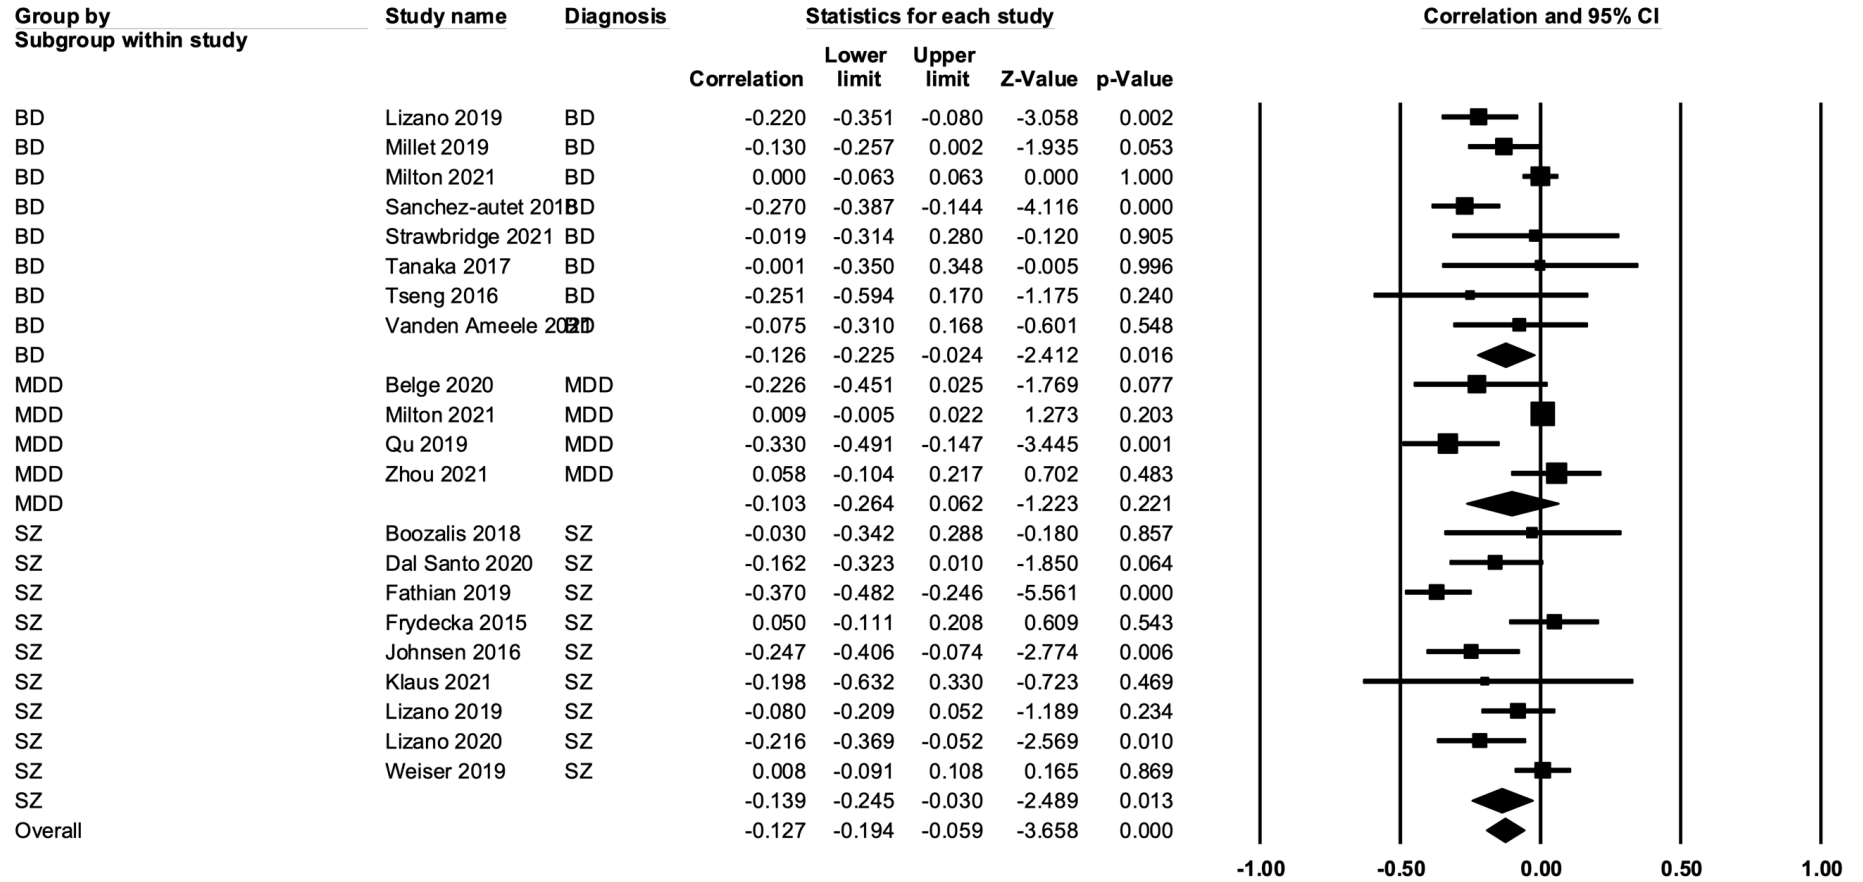

Supplementary Figure 16: Forest Plot for correlation studies between IFN-g and Global Cognition for all studies, as well as diagnostic subgroups (Bipolar Disorder (BD), Major Depressive Disorder (MDD), and schizophrenia spectrum disorders (SZ))

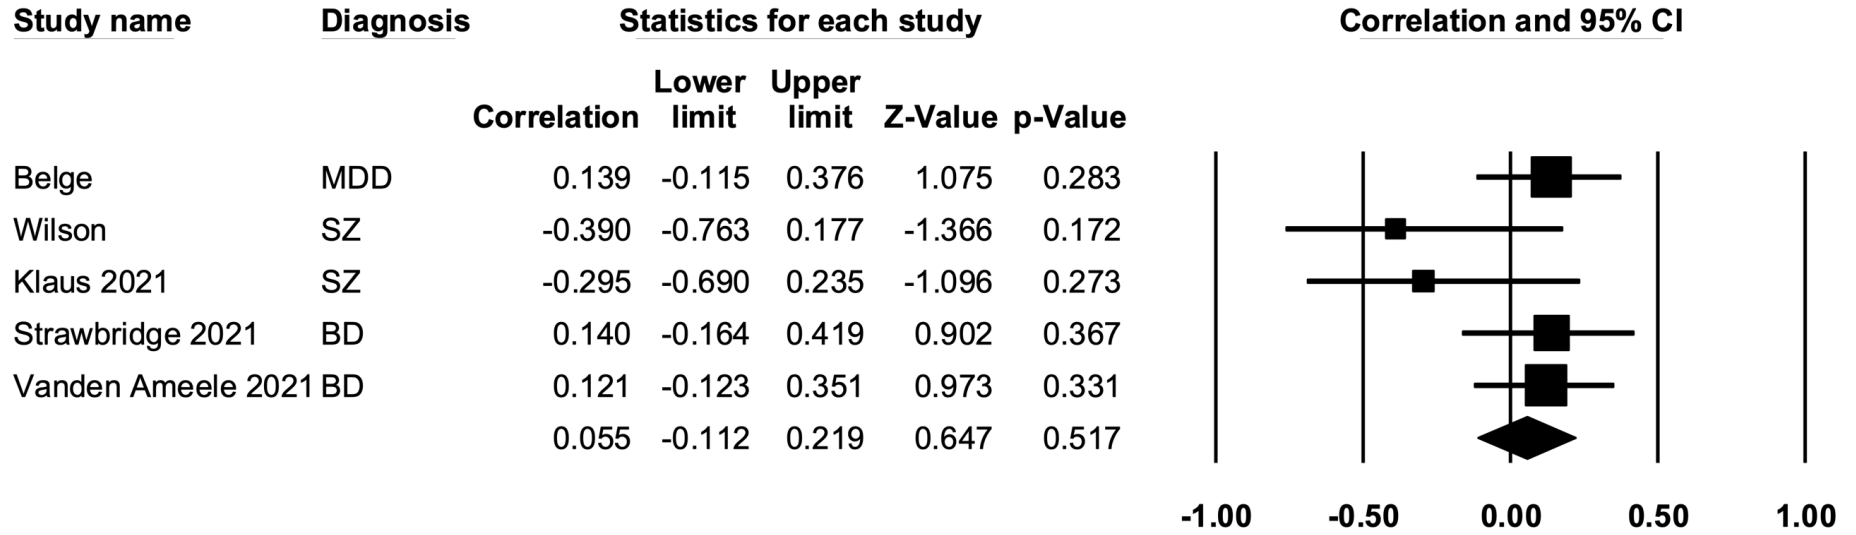

Supplementary Figure 17: Forest Plot for correlation studies between IL-1b and Global Cognition for all studies, as well as diagnostic subgroups (Bipolar Disorder (BD), Major Depressive Disorder (MDD), and schizophrenia spectrum disorders (SZ))

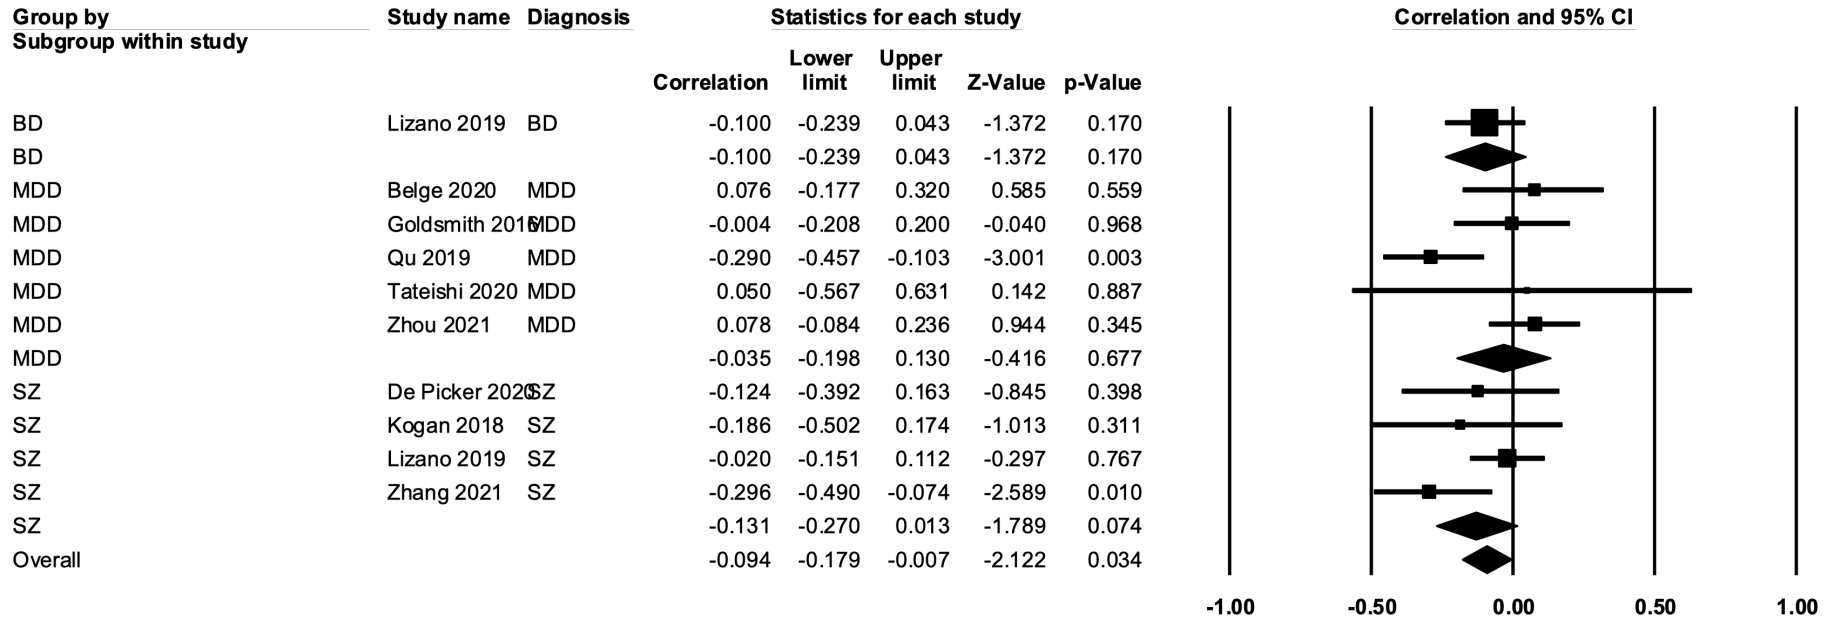

Supplementary Figure 18: Forest Plot for correlation studies between IL-6 and Global Cognition for all studies, as well as diagnostic subgroups (Bipolar Disorder (BD), Major Depressive Disorder (MDD), and schizophrenia spectrum disorders (SZ))

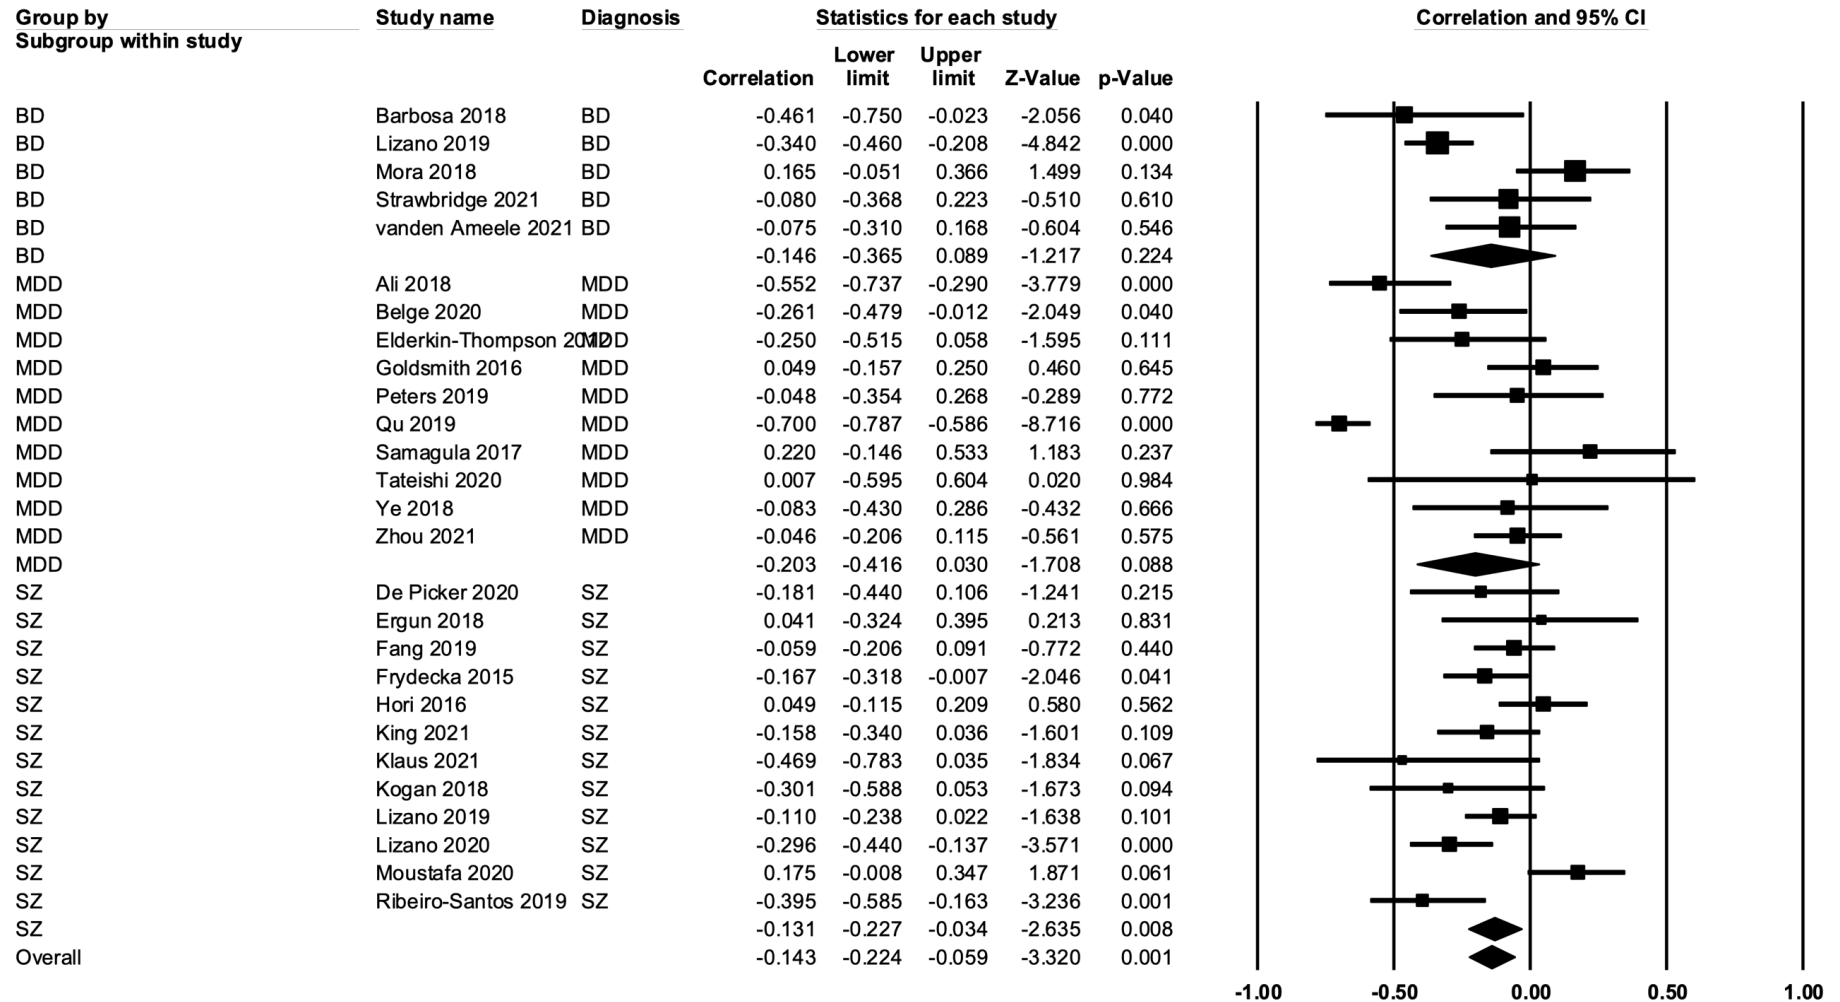

Supplementary Figure 19: Forest Plot for correlation studies between TNF-a and Global Cognition for all studies, as well as diagnostic subgroups (Bipolar Disorder (BD), Major Depressive Disorder (MDD), and schizophrenia spectrum disorders (SZ))

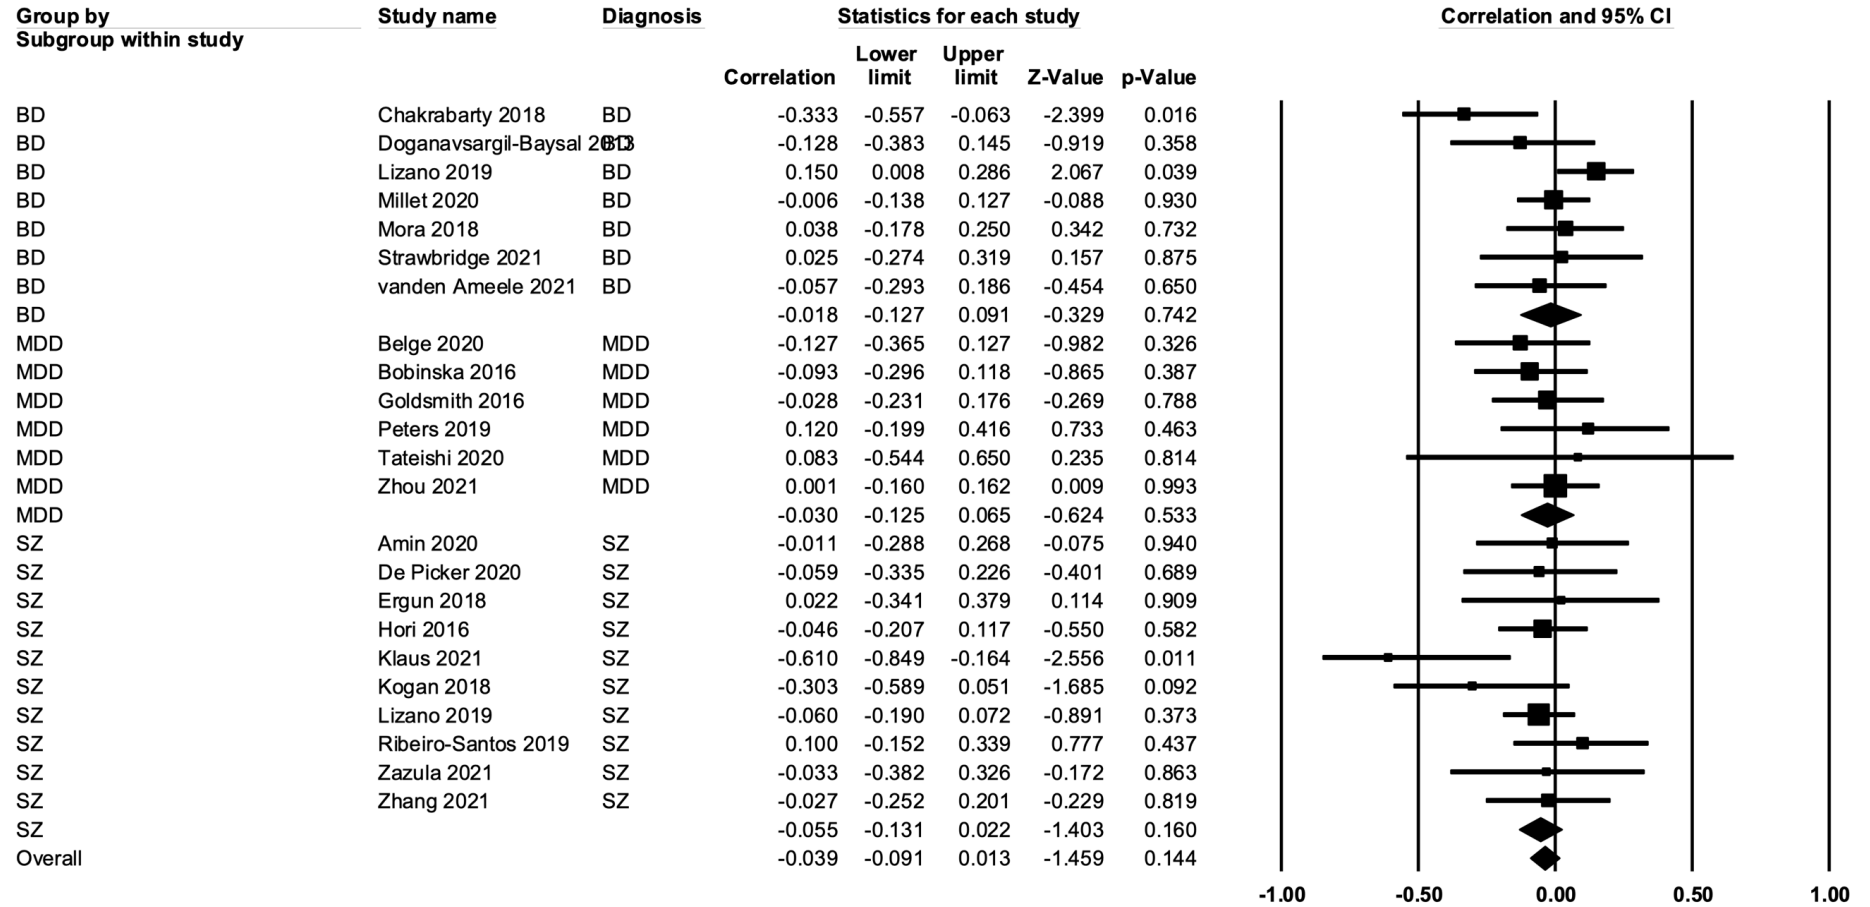

Supplementary Figure 20: Funnel Plot Correlation studies of Pro Inflammatory Index (PII) with Global Cognition

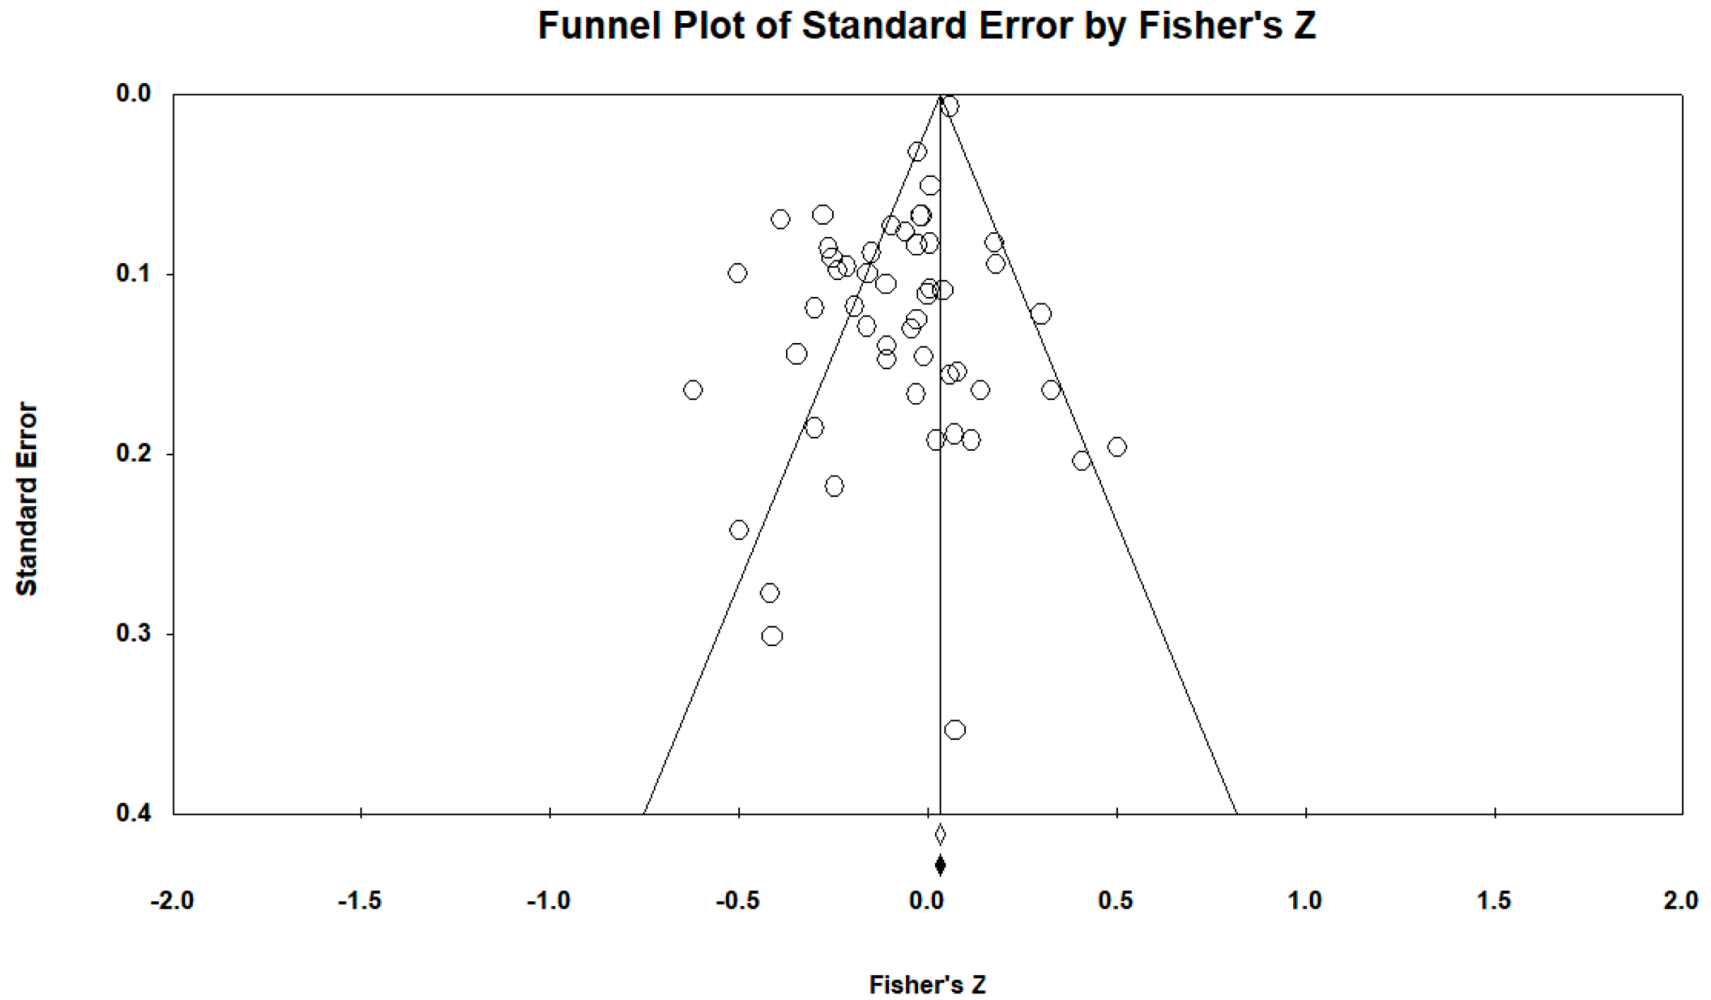

Supplementary Figure 21: Funnel Plot Correlation Studies CRP with Global Cognition

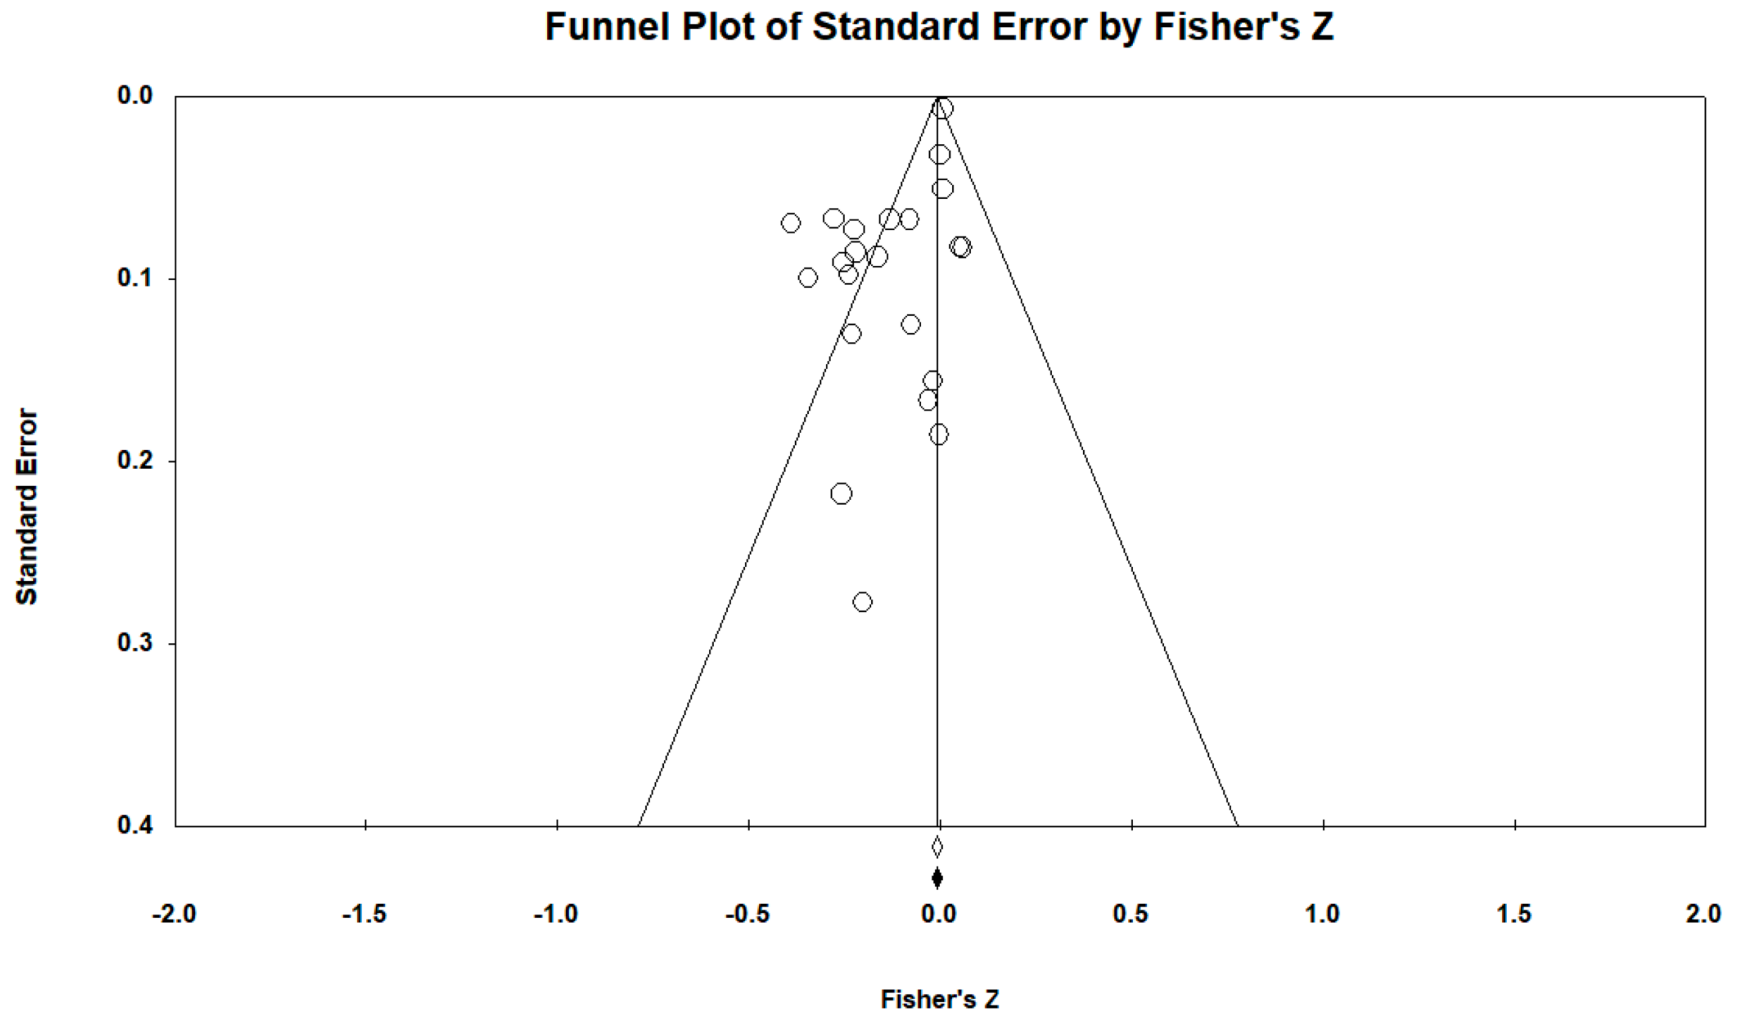



Supplementary Figure 22: Funnel Plot Correlation Studies IL-6 with Global Cognition

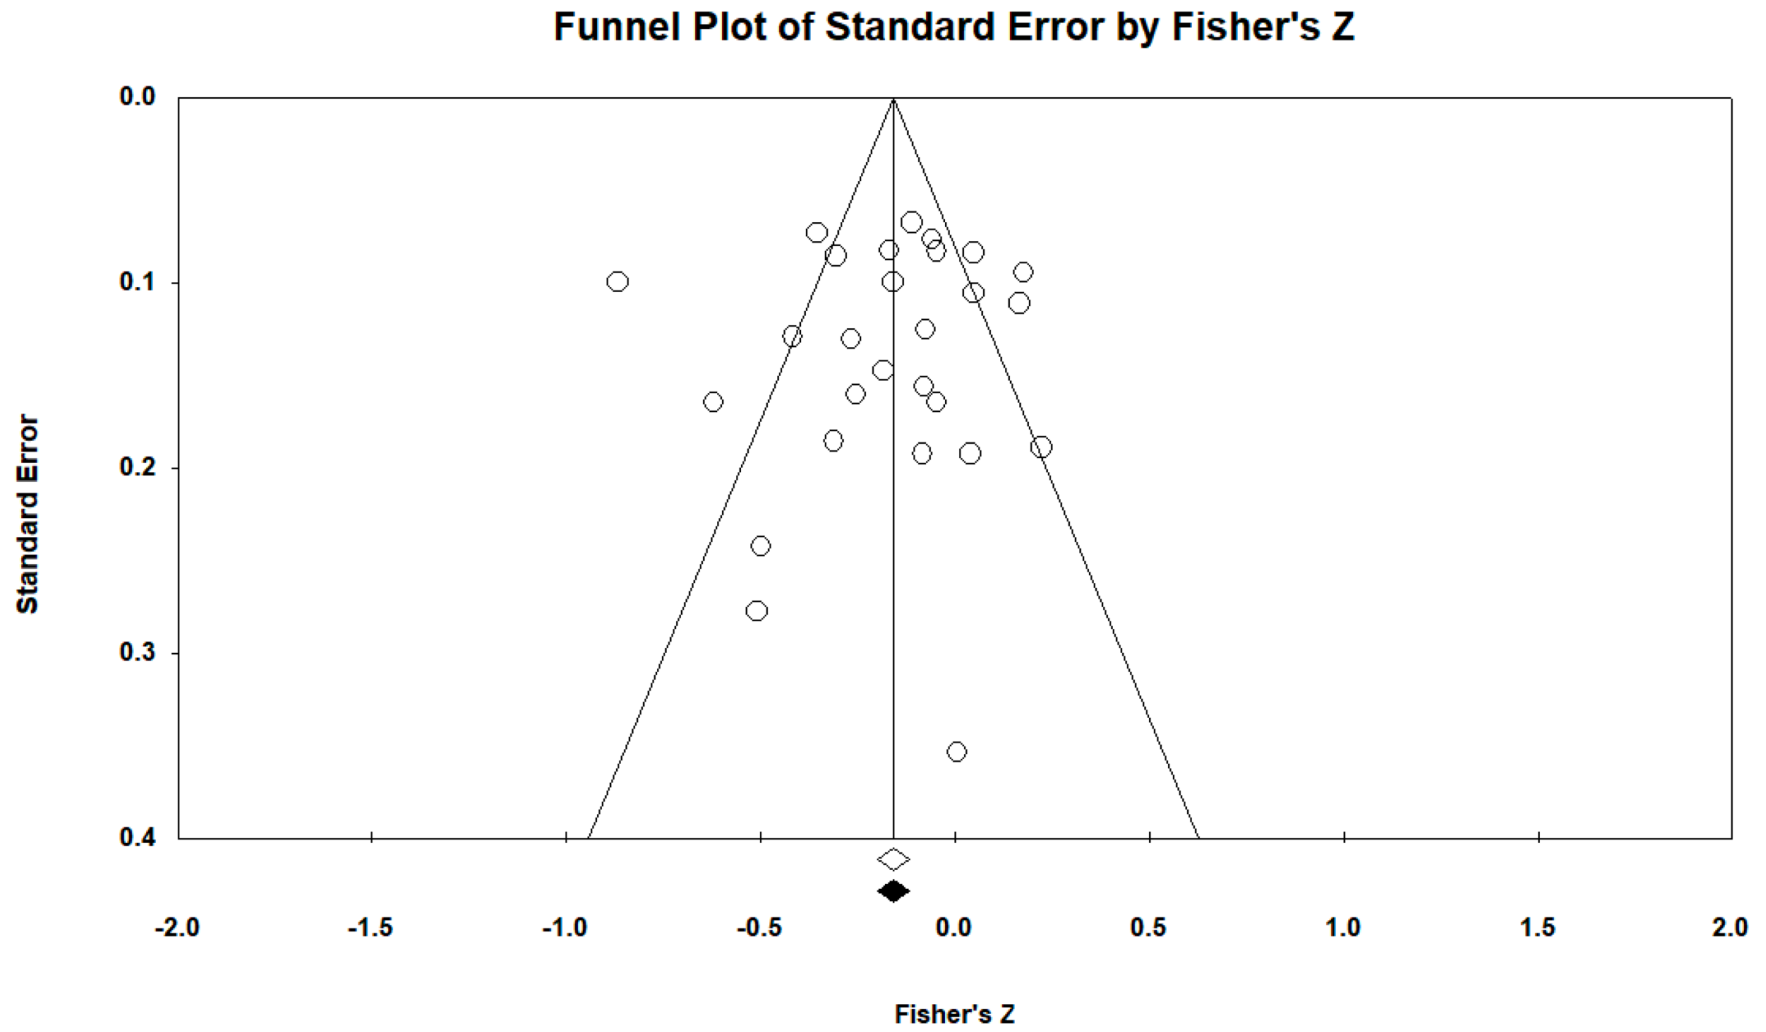

Supplementary document: Protocol (12/9/2021) + Update to protocol 4/1/2022 (PROSPERO) + Final Protocol (version 4/1/2022)

**Supplementary document: Protocol : The relationship between immune and cognitive dysfunction in mood and psychotic disorder: a systematic review and a meta-analysis**

Submitted PROSPERO: 12/9/2021

The current meta-analysis aims to evaluate the presence of an association between immune-related aberrances and neuropsychological deficits in mood and psychotic disorders. The impact of reporting and publication bias will be evaluated.

Review Questions

- 1) Are neuropsychological deficits associated to centrally assessed immune-related biomarkers in mood and psychotic disorder?
- 2) Are neuropsychological deficits associated to peripherally assessed immune-related biomarkers in mood and psychotic disorders?
- 3) If present, are these associations different in mood versus psychotic disorders?
- 4) Are these associations moderated by publication year, age, duration of illness, gender, smoking status or BMI?

Studies included in the review:

- Cross-sectional or longitudinal studies in peer reviewed journals
- Studies investigating a patient group with either psychotic or mood disorder, i.e. Primary diagnosis of Schizophrenia, schizophreniform disorder, Schizoaffective disorder, Psychotic disorder NOS, Brief Psychotic Disorder, Major Depressive disorder, Bipolar Disorder, Dysthymia
- Inclusion of at least 1 neuropsychological measure (NP)
- Inclusion of at least 1 immune-related marker (IM)

Exclusion criteria

- Case reports, case series
- Abstracts, conference proceedings
- Systematic review, narrative review
- Opinion paper
- Meta-analysis

## Search strategy

| platform       | Search strategy                                                                                                                                                                                                                                                                                                                                                                                                                                                                                                                                                                                                                                                                                                                                                                                                                                                                                                                                                                                                                                                                                                                                                                                                                                                                      |
|----------------|--------------------------------------------------------------------------------------------------------------------------------------------------------------------------------------------------------------------------------------------------------------------------------------------------------------------------------------------------------------------------------------------------------------------------------------------------------------------------------------------------------------------------------------------------------------------------------------------------------------------------------------------------------------------------------------------------------------------------------------------------------------------------------------------------------------------------------------------------------------------------------------------------------------------------------------------------------------------------------------------------------------------------------------------------------------------------------------------------------------------------------------------------------------------------------------------------------------------------------------------------------------------------------------|
| Pubmed         | (schizophreni* OR schizoaffective OR psychotic OR psychosis OR MDD OR “depressive disorder” OR “major depression” OR manic OR mania OR bipolar OR “mood disorder” OR “affective disorder” OR dysthym*) AND (immun* OR chemokine* OR cytokine* OR interleukin* OR CRP OR C-reactive OR IL-1b OR IL-1 $\beta$ OR IL-1ra OR IL-2 OR IL-4 OR IL-6 OR IL-8 OR IL-10 OR IL-12 OR “tumor necrosis factor” OR TNF OR IFN OR IFN- $\gamma$ OR Interferon* OR kynuren* OR quinolinic OR xanthurenic OR picolinic OR anthranilic OR HLA OR lymphocyt* OR monocyt* OR Leukocyt* OR neutrophil* OR basophil* or eosinophil*) AND (cogniti* OR attenti* OR vigilan* OR “executive functioning” OR reasoning OR “problem solving” OR memory OR learning OR “processing speed”) NOT (review [Publication type])                                                                                                                                                                                                                                                                                                                                                                                                                                                                                      |
| Web of Science | (ALL=(schizophreni* ) OR ALL=(schizoaffective) OR ALL=(psychotic) OR ALL=(psychosis) OR ALL=(MDD) OR ALL=(depressive disorder) OR ALL=(major depression) OR ALL=(manic) OR ALL=(mania) OR ALL=(bipolar ) OR ALL=(mood disorder) OR ALL=(affective disorder) OR ALL=(dysthym*)) AND (ALL=(immun*) OR ALL=(chemokine*) OR ALL=(cytokine* ) OR ALL=(interleukin*) OR ALL=(CRP) OR ALL=(C-reactive) OR ALL=(IL-1b) OR ALL=(IL-1 $\beta$ ) OR ALL=(IL-1ra) OR ALL=(IL-2) OR ALL=(IL-4) OR ALL=(IL-6) OR ALL=(IL-8) OR ALL=(IL-10) OR ALL=(IL-12) OR ALL=(tumor necrosis factor) OR ALL=(TNF) OR ALL=(IFN) OR ALL=(IFN- $\gamma$ ) OR ALL=(Interferon*) OR ALL=(kynuren*) OR ALL=(quinolinic) OR ALL=(xanthurenic) OR ALL=(picolinic) OR ALL=(anthranilic) OR ALL=(HLA) OR ALL=(lymphocyt*) OR ALL=(monocyt*) OR ALL=(leukocyt*) OR ALL=(neutrophil*) OR ALL=(basophil*) OR ALL=(eosinophil*)) AND (ALL=(cognitive*) OR ALL=(attenti*) OR ALL=(vigilan*) OR ALL=(executive functioning) OR ALL=(reasoning) OR ALL=(problem solving) OR ALL=(memory) OR ALL=(learning) OR ALL=(processing speed))                                                                                                                                                                                           |
| Psycinfo       | <b>Any Field:</b> schizophrenia OR <b>Any Field:</b> schizophreniform OR <b>Any Field:</b> psychotic OR <b>Any Field:</b> psychosis OR <b>Any Field:</b> MDD OR <b>Any Field:</b> depressive disorder OR <b>Any Field:</b> major depression OR <b>Any Field:</b> manic OR <b>Any Field:</b> mania OR <b>Any Field:</b> bipolar OR <b>Any Field:</b> mood disorder OR <b>Any Field:</b> affective disorder OR <b>Any Field:</b> dysthymia AND <b>Any Field:</b> Immune OR cytokine OR chemokine OR interleukin OR CRP OR IL-1b OR IL-1 $\beta$ OR IL-1ra OR IL-2 OR IL-4 OR IL-6 OR IL-8 OR IL-10 OR IL-12 OR tumor necrosis factor OR TNF OR IFN OR IFN- $\gamma$ OR Interferon OR kynurenine OR kynurenic OR quinolinic OR xanthurenic OR picolinic OR anthranilic OR HLA OR lymphocyte OR monocyte OR Leukocyte OR neutrophil OR basophil or eosinophil AND <b>Any Field:</b> cognition OR <b>Any Field:</b> cognitive OR <b>Any Field:</b> attention OR <b>Any Field:</b> vigilance OR <b>Any Field:</b> executive function OR <b>Any Field:</b> executive functioning OR <b>Any Field:</b> reasoning OR <b>Any Field:</b> problem solving OR <b>Any Field:</b> memory OR <b>Any Field:</b> learning OR <b>Any Field:</b> processing speed AND <b>Peer-Reviewed Journals only</b> |

Main outcome measure:

A correlation value (pearson's r or rho value) or regression coefficient (B value) reporting on the association between neuropsychological measure(s) (NP) and immune-related marker(s) (IM)

Data extraction:

Two reviewers (MM and CO) will independently evaluate the search results. Title and abstract of all search hits will be evaluated based on inclusion and exclusion criteria. Relevant or potentially relevant papers will be extracted:

- author, publication year, diagnosis, sample size, mean age, mean DOI, gender ratio, %smoking, mean BMI, name of cognitive domain, name of cognitive test, immune biomarker, tissue (serum, plasma, CSF, tracer, cells), bioanalytical method - correlation (pearson's r or rho value) or regression coefficient (B value) between neuropsychological measure(s) and immune-related biomarker(s), p-value.
- Number of neuropsychological tests included in the study
- number of immune biomarkers included in the study
- number of reported correlations

Data will be recorded in excel sheet.

Investigated cognitive domains and cognitive tests included

| Domain                        | Tests                                                                                                                             |
|-------------------------------|-----------------------------------------------------------------------------------------------------------------------------------|
| Verbal learning and memory    | List learning tasks (RBANS-memory, BACS, CVLT, RaVLT,...)                                                                         |
| Visual learning and memory    | RBANS-visuospatial; pairs matching test;                                                                                          |
| Working memory                | LNS, Letter sequencing, Digit backward, spatial span test, Digit sequencing test, BACS-WM, MCCB-WM, delayed match to sample test, |
| Attention and vigilance       | RBANS-attention, MCCB-attention, BACS-attention, CANTAB-attention, CPT, Digit span, simple reaction time                          |
| Processing speed              | Digit Symbol Coding tests, TMTB                                                                                                   |
| Reasoning and problem solving | WCST, Tower of London, CANTAB-set shift, Stroop test, Mazes, BACS-EF, abstraction test, matrix reasoning, MCCB reasoning,         |
| Language                      | RBANS-language, Verbal Fluency tests, COWAT, naming test                                                                          |

When in a single study more than one IM is correlated to a specific cognitive domain on a composite score will be calculated (based on Fisher's z transformation of the r values), resulting in a single r score reflecting the association of the merged correlational values between the cognitive domain and the pro-inflammatory and anti-inflammatory markers.

Authors of the papers with missing results will be contacted. In case of non-response, a reminder will be sent.

Risk of Bias Assessment:

Biocross will be used to assess the quality of the studies

Strategy for meta-analysis

- Comprehensive Meta Analysis (CMA) will be used for the meta-analysis.
- Correlation and 95% CI as well as Z-value and p value will be reported per study, as well as for the overall summary of the random model
- Analyses will be performed for:
  - o Psychotic and mood disorders combined, as well as for three diagnostic groups separately (SZ, BD, MDD)
  - o For pro-inflammatory markers combined
  - o For anti-inflammatory markers combined
  - o For biomarkers that have been investigated in at least three different, independent studies in the same diagnosis (e.g. CRP, IL-6, IL-1b) for the same cognitive domain, separate meta-analyses will be performed

## Update to protocol 4/1/2022

### Review Question

Given that MDD and BD should be evaluated as separate diagnoses, rather than a group of 'mood disorders', we chose to separately analyze these diagnostic groups, rather than lumping them together

Research question 3 was adapted: "If present, are these associations different in mood versus psychotic disorders?"

was adjusted into

"Are those associations different between Schizophrenia (SZ), Major Depressive Disorder (MDD) and Bipolar Disorder (BD)?"

### Main outcome(s)

The following analyses were already described in the analyses plan of the original PROSPERO registration, but we chose to clarify how the pro-inflammatory index (PII) and Anti-inflammatory Index (All) were calculated. Therefore we added the following passage in the updated registration.

#### The following passage needs to be added:

"The primary Immunomarker (IM) outcome variables will be two composite inflammatory indices

- Pro-inflammatory Index, PII
- Anti-Inflammatory Index, All

If only a single IM is included in the study, that IM x Neuropsychological measure correlation coefficient will be used for the PII/All associations. If more IM are included, PII and All will be calculated for each cognitive domain, averaging out the associations between that specific cognitive domain on one hand and the available immunomarker-based correlations on the other (based on Fisher's z transformation of the r values)."

"Primary outcome of the study is PII/All x composite score for all combined diagnoses.

PII/All x individual cognitive domains for combined diagnosis and the separate diagnoses (SZ, MDD, BD) will also be calculated and reported"

### Additional outcomes

The following analyses were performed as secondary outcome analyses

“Secondary IM outcome variables are individual IM when >3 studies are available.

In case of a significant association, exploratory subgroup analyses will be performed to define which of the diagnoses contributes to the statistically significant association.”

#### Risk of bias (quality) assessment

Because the majority of the studies were cross-sectional studies, GRADE could not be used as a tool for Quality Assessment. Therefore, we chose the more appropriate tool BIOCROSS.

“Quality assessment of eligible papers was performed with the BIOCROSS evaluation tool, which is specifically developed for biomarker-based cross-sectional studies.”

#### Analysis of subgroups or subsets

In line with the adjustments made in RQ3

Three patient subgroups will be analyzed:

- all diagnoses combined
- psychotic disorders and mood disorders separately

#### Was changed into

Three patient subgroups will be analyzed:

- all diagnoses combined
- Schizophrenia, Major Depressive Disorder and Bipolar Disorder separately

**Supplementary document: Final Protocol : The relationship between immune and cognitive dysfunction in mood and psychotic disorder: a systematic review and a meta-analysis**

PROSPERO 2021 CRD42021278371

Version 4/1/2022

The current meta-analysis aims to evaluate the presence of an association between immune-related aberrances and neuropsychological deficits in mood and psychotic disorders. The impact of reporting and publication bias will be evaluated.

Review Questions

- 5) Are neuropsychological deficits associated to centrally assessed immune-related biomarkers in mood and psychotic disorder?
- 6) Are neuropsychological deficits associated to peripherally assessed immune-related biomarkers in mood and psychotic disorders?
- 7) Are those associations different between Schizophrenia (SZ), Major Depressive Disorder (MDD) and Bipolar Disorder (BD)?”
- 8) Are these associations moderated by publication year, age, duration of illness, gender, smoking status or BMI?

Studies included in the review:

- Cross-sectional or longitudinal studies in peer reviewed journals
- Studies investigating a patient group with either psychotic or mood disorder, i.e. Primary diagnosis of Schizophrenia, schizophreniform disorder, Schizoaffective disorder, Psychotic disorder NOS, Brief Psychotic Disorder, Major Depressive disorder, Bipolar Disorder, Dysthymia
- Inclusion of at least 1 neuropsychological measure (NP)
- Inclusion of at least 1 immune-related marker (IM)

Exclusion criteria

- Case reports, case series
- Abstracts, conference proceedings
- Systematic review, narrative review
- Opinion paper
- Meta-analysis



## Search strategy

| platform       | Search strategy                                                                                                                                                                                                                                                                                                                                                                                                                                                                                                                                                                                                                                                                                                                                                                                                                                                                                                                                                                                                                                                                                                                                                                                                                                                                      |
|----------------|--------------------------------------------------------------------------------------------------------------------------------------------------------------------------------------------------------------------------------------------------------------------------------------------------------------------------------------------------------------------------------------------------------------------------------------------------------------------------------------------------------------------------------------------------------------------------------------------------------------------------------------------------------------------------------------------------------------------------------------------------------------------------------------------------------------------------------------------------------------------------------------------------------------------------------------------------------------------------------------------------------------------------------------------------------------------------------------------------------------------------------------------------------------------------------------------------------------------------------------------------------------------------------------|
| Pubmed         | (schizophreni* OR schizoaffective OR psychotic OR psychosis OR MDD OR “depressive disorder” OR “major depression” OR manic OR mania OR bipolar OR “mood disorder” OR “affective disorder” OR dysthym*) AND (immun* OR chemokine* OR cytokine* OR interleukin* OR CRP OR C-reactive OR IL-1b OR IL-1 $\beta$ OR IL-1ra OR IL-2 OR IL-4 OR IL-6 OR IL-8 OR IL-10 OR IL-12 OR “tumor necrosis factor” OR TNF OR IFN OR IFN- $\gamma$ OR Interferon* OR kynuren* OR quinolinic OR xanthurenic OR picolinic OR anthranilic OR HLA OR lymphocyt* OR monocyt* OR Leukocyt* OR neutrophil* OR basophil* or eosinophil*) AND (cogniti* OR attenti* OR vigilan* OR “executive functioning” OR reasoning OR “problem solving” OR memory OR learning OR “processing speed”) NOT (review [Publication type])                                                                                                                                                                                                                                                                                                                                                                                                                                                                                      |
| Web of Science | (ALL=(schizophreni* ) OR ALL=(schizoaffective) OR ALL=(psychotic) OR ALL=(psychosis) OR ALL=(MDD) OR ALL=(depressive disorder) OR ALL=(major depression) OR ALL=(manic) OR ALL=(mania) OR ALL=(bipolar ) OR ALL=(mood disorder) OR ALL=(affective disorder) OR ALL=(dysthym*)) AND (ALL=(immun*) OR ALL=(chemokine*) OR ALL=(cytokine* ) OR ALL=(interleukin*) OR ALL=(CRP) OR ALL=(C-reactive) OR ALL=(IL-1b) OR ALL=(IL-1 $\beta$ ) OR ALL=(IL-1ra) OR ALL=(IL-2) OR ALL=(IL-4) OR ALL=(IL-6) OR ALL=(IL-8) OR ALL=(IL-10) OR ALL=(IL-12) OR ALL=(tumor necrosis factor) OR ALL=(TNF) OR ALL=(IFN) OR ALL=(IFN- $\gamma$ ) OR ALL=(Interferon*) OR ALL=(kynuren*) OR ALL=(quinolinic) OR ALL=(xanthurenic) OR ALL=(picolinic) OR ALL=(anthranilic) OR ALL=(HLA) OR ALL=(lymphocyt*) OR ALL=(monocyt*) OR ALL=(leukocyt*) OR ALL=(neutrophil*) OR ALL=(basophil*) OR ALL=(eosinophil*)) AND (ALL=(cognitive*) OR ALL=(attenti*) OR ALL=(vigilan*) OR ALL=(executive functioning) OR ALL=(reasoning) OR ALL=(problem solving) OR ALL=(memory) OR ALL=(learning) OR ALL=(processing speed))                                                                                                                                                                                           |
| Psycinfo       | <b>Any Field:</b> schizophrenia OR <b>Any Field:</b> schizophreniform OR <b>Any Field:</b> psychotic OR <b>Any Field:</b> psychosis OR <b>Any Field:</b> MDD OR <b>Any Field:</b> depressive disorder OR <b>Any Field:</b> major depression OR <b>Any Field:</b> manic OR <b>Any Field:</b> mania OR <b>Any Field:</b> bipolar OR <b>Any Field:</b> mood disorder OR <b>Any Field:</b> affective disorder OR <b>Any Field:</b> dysthymia AND <b>Any Field:</b> Immune OR cytokine OR chemokine OR interleukin OR CRP OR IL-1b OR IL-1 $\beta$ OR IL-1ra OR IL-2 OR IL-4 OR IL-6 OR IL-8 OR IL-10 OR IL-12 OR tumor necrosis factor OR TNF OR IFN OR IFN- $\gamma$ OR Interferon OR kynurenine OR kynurenic OR quinolinic OR xanthurenic OR picolinic OR anthranilic OR HLA OR lymphocyte OR monocyte OR Leukocyte OR neutrophil OR basophil or eosinophil AND <b>Any Field:</b> cognition OR <b>Any Field:</b> cognitive OR <b>Any Field:</b> attention OR <b>Any Field:</b> vigilance OR <b>Any Field:</b> executive function OR <b>Any Field:</b> executive functioning OR <b>Any Field:</b> reasoning OR <b>Any Field:</b> problem solving OR <b>Any Field:</b> memory OR <b>Any Field:</b> learning OR <b>Any Field:</b> processing speed AND <b>Peer-Reviewed Journals only</b> |

### Main outcome measure:

Correlation value (pearson's r or rho value) or regression coefficient (B value) reporting on the association between neuropsychological measure(s) (NP) and immune-related marker(s) (IM) will be included in the study.

The primary Immunomarker (IM) outcome variables will be two composite inflammatory indices

- Pro-inflammatory Index, PII
- Anti-Inflammatory Index, AII

If only a single IM is included in the study, that IM x Neuropsychological measure correlation coefficient will be used for the PII/AII associations. If more IM are included, PII and AII will be calculated for each cognitive domain, averaging out the associations between that specific cognitive domain on one hand and the available immunomarker-based correlations on the other (based on Fisher's z transformation of the r values).“

Primary outcome of the study is PII/AII x composite score for all combined diagnoses.

PII/AII x individual cognitive domains for combined diagnosis and the separate diagnoses (SZ, MDD, BD) will also be calculated and reported.

### Additional outcomes

Secondary IM outcome variables are individual IM when >3 studies are available.

In case of a significant association, exploratory subgroup analyses will be performed to define which of the diagnoses contributes to the statistically significant association.

### Data extraction:

Two reviewers (MM and CO) will independently evaluate the search results. Title and abstract of all search hits will be evaluated based on inclusion and exclusion criteria. Relevant or potentially relevant papers will be extracted:

- author, publication year, diagnosis, sample size, mean age, mean DOI, gender ratio, %smoking, mean BMI, name of cognitive domain, name of cognitive test, immune biomarker, tissue (serum, plasma, CSF, tracer, cells), bioanalytical method - correlation (pearson's r or rho value) or regression coefficient (B value) between neuropsychological measure(s) and immune-related biomarker(s), p-value.
- Number of neuropsychological tests included in the study
- number of immune biomarkers included in the study
- number of reported correlations

Data will be recorded in excel sheet.

Investigated cognitive domains and cognitive tests included

| Domain                        | Tests                                                                                                                             |
|-------------------------------|-----------------------------------------------------------------------------------------------------------------------------------|
| Verbal learning and memory    | List learning tasks (RBANS-memory, BACS, CVLT, RaVLT,...)                                                                         |
| Visual learning and memory    | RBANS-visuospatial; pairs matching test;                                                                                          |
| Working memory                | LNS, Letter sequencing, Digit backward, spatial span test, Digit sequencing test, BACS-WM, MCCB-WM, delayed match to sample test, |
| Attention and vigilance       | RBANS-attention, MCCB-attention, BACS-attention, CANTAB-attention, CPT, Digit span, simple reaction time                          |
| Processing speed              | Digit Symbol Coding tests, TMTB                                                                                                   |
| Reasoning and problem solving | WCST, Tower of London, CANTAB-set shift, Stroop test, Mazes, BACS-EF, abstraction test, matrix reasoning, MCCB reasoning,         |
| Language                      | RBANS-language, Verbal Fluency tests, COWAT, naming test                                                                          |

Authors of the papers with missing results will be contacted. In case of non-response, a reminder will be sent.

Risk of Bias Assessment:

Quality assessment of eligible papers was performed with the BIOCROSS evaluation tool, which is specifically developed for biomarker-based cross-sectional studies

Strategy for meta-analysis

- Comprehensive Meta Analysis (CMA) will be used for the meta-analysis.
- Correlation and 95% CI as well as Z-value and p value will be reported per study, as well as for the overall summary of the random model
- Analyses will be performed for:

- Composite cognitive score as well as individual cognitive domains
- Psychotic and mood disorders combined, as well as for three diagnostic groups separately (SZ, BD, MDD)
- For pro-inflammatory markers combined
- For anti-inflammatory markers combined
- For biomarkers that have been investigated in at least three different, independent studies in the same diagnosis (e.g. CRP, IL-6, IL-1b) for the same cognitive domain, separate meta-analyses will be performed
